# Supplementary material for: Inhibitory Effect of Dietary Defatted Rice Bran in an AOM/DSS-Induced Colitis-Associated Colorectal Cancer Experimental Animal Model
Source: MDPI journal article supplement (doi:10.3390/foods11213488), 2022-11-02

COX-2

1 2 3 4 5 6

COX-2

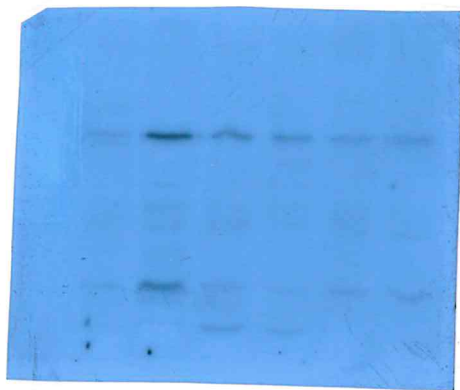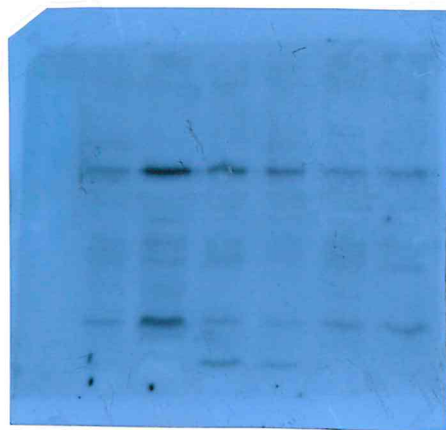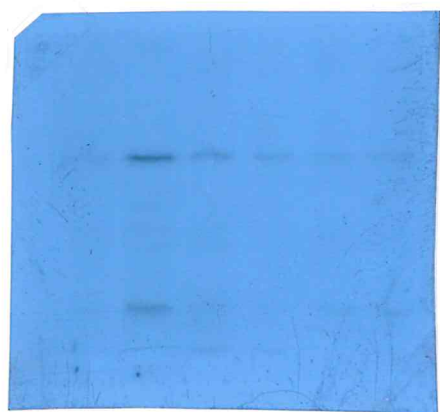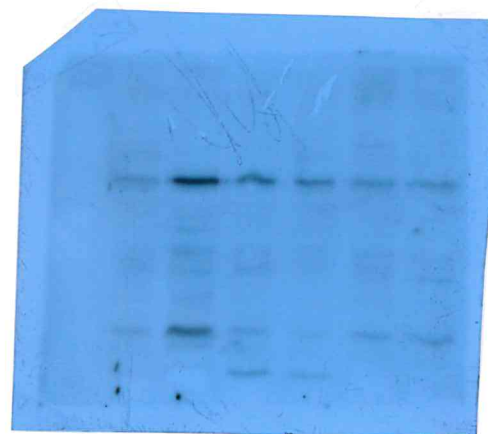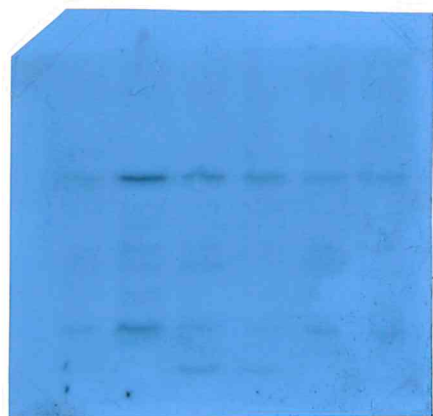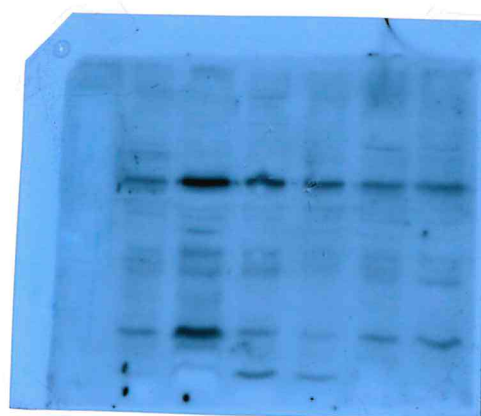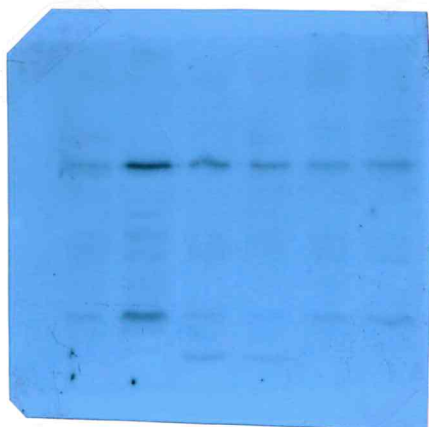

lane 1 Control group  
lane 2 AOM/DSS group  
lane 3 AOM/DSS + DRB 3 g group  
lane 4 AOM/DSS + DRB 6 g group  
lane 5 DRB 3 g  
lane 6 DRB 6 g

NF-kB

1 2 3 4 5 6

NF-kB

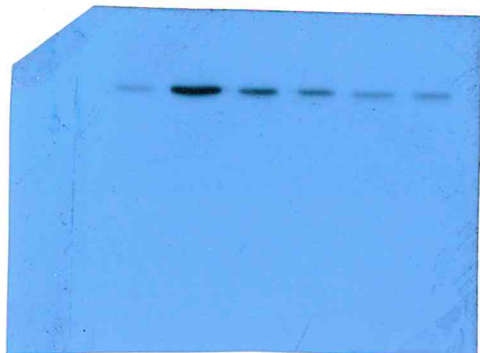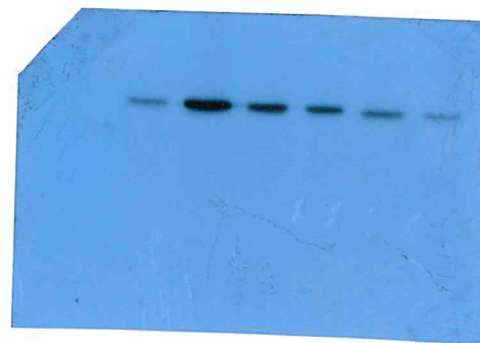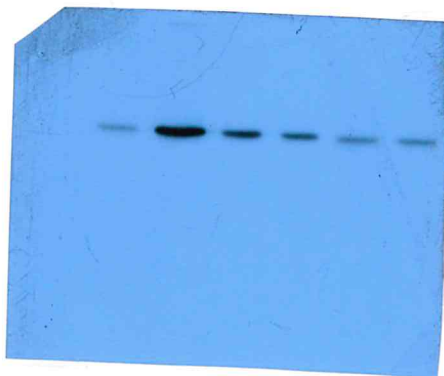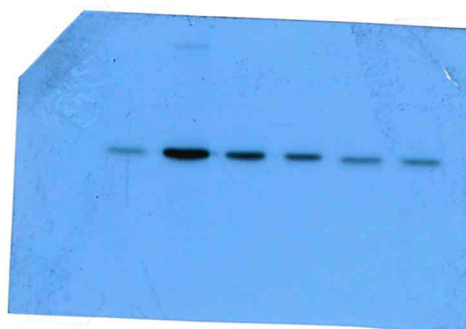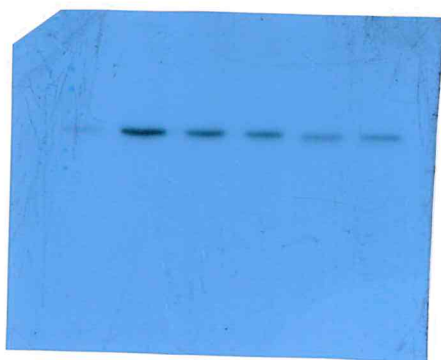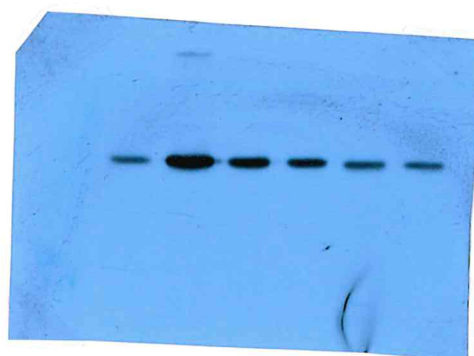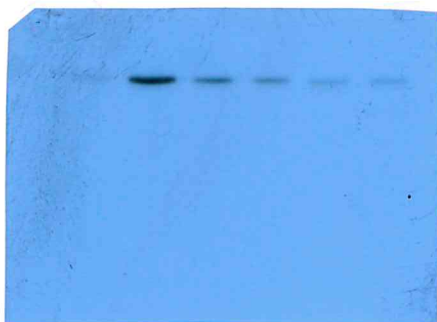

lane 1 Control group  
lane 2 AOM/DSS group  
lane 3 AOM/DSS + DRB 3 g group  
lane 4 AOM/DSS + DRB 6 g group  
lane 5 DRB 3 g  
lane 6 DRB 6 g

$\beta$ -actin 989 NFkB 1712121  
NF-kB

B-actin

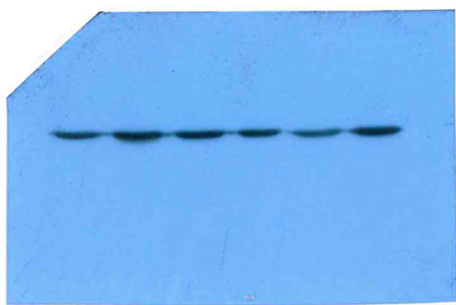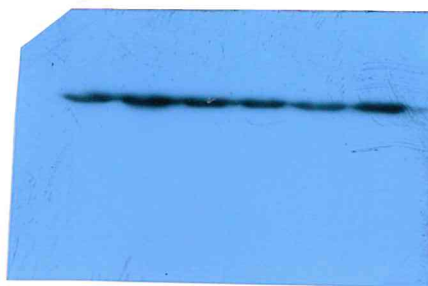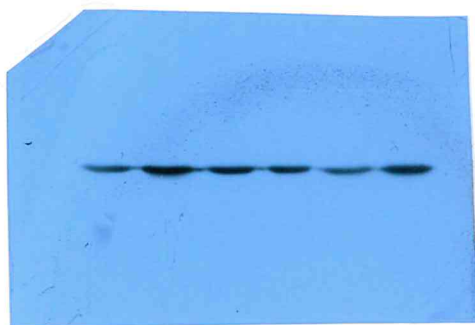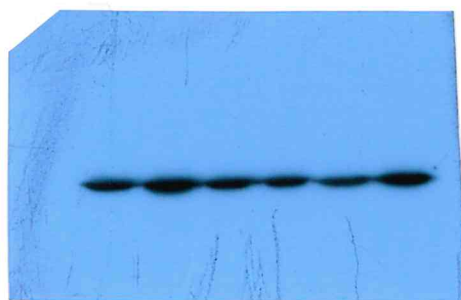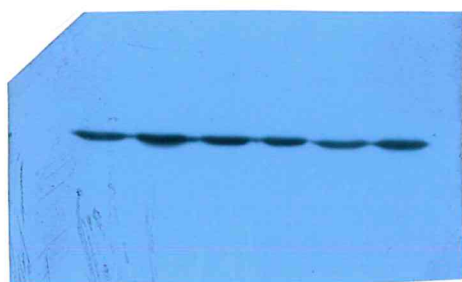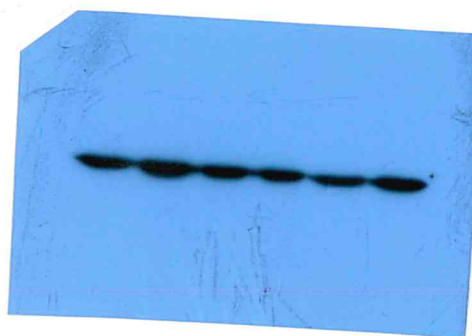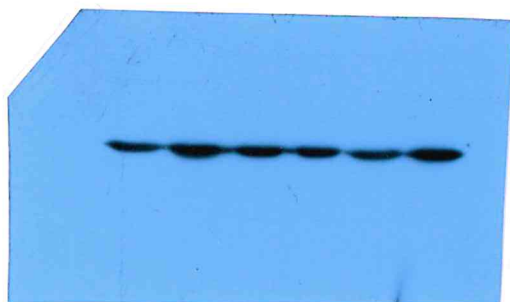

$\beta$ -actin 100 COX-2 1114121

Cox-2

B-actin

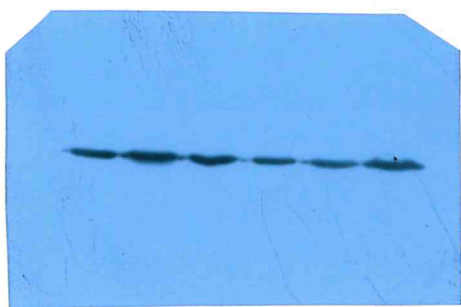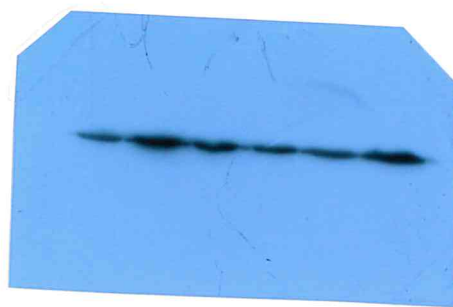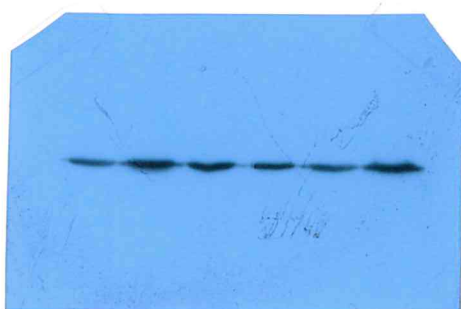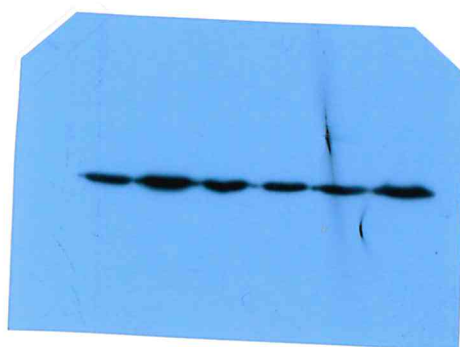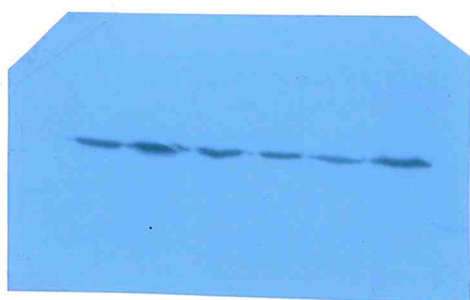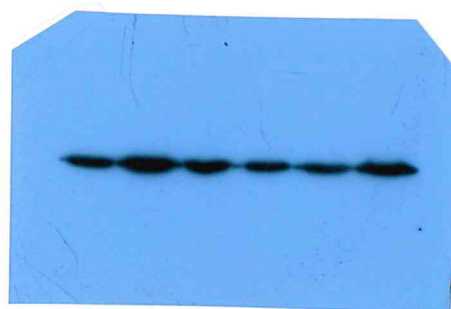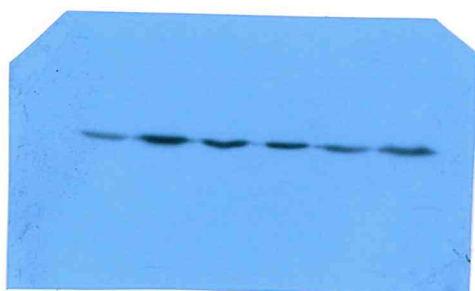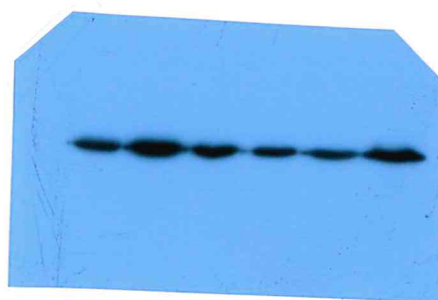

Supplement: s1 [file s1]
