# Supplementary material for: Inhibitory Effect of Dietary Defatted Rice Bran in an AOM/DSS-Induced Colitis-Associated Colorectal Cancer Experimental Animal Model
Source: MDPI journal article supplement (doi:10.3390/foods11213488), 2022-11-02
Supplement: s1 [file s1]

## Phenolic acid Standards

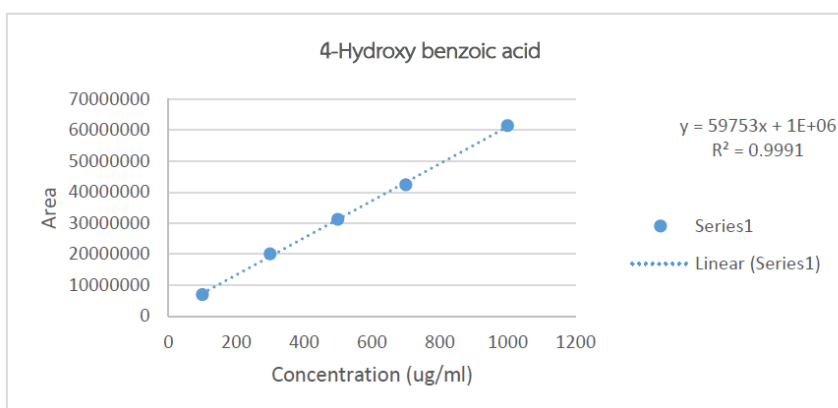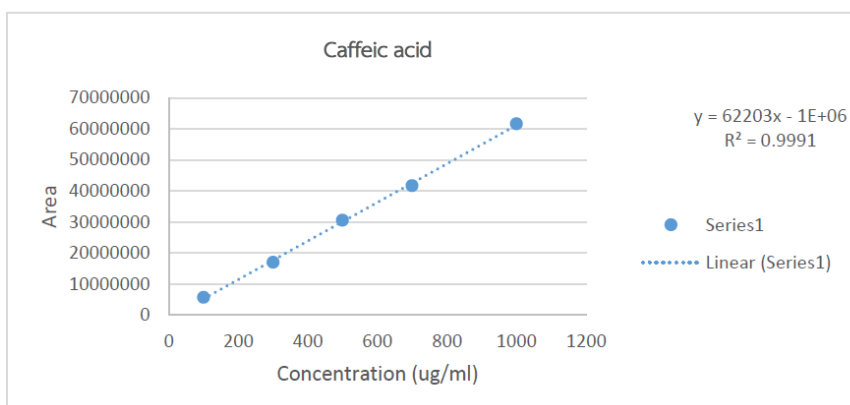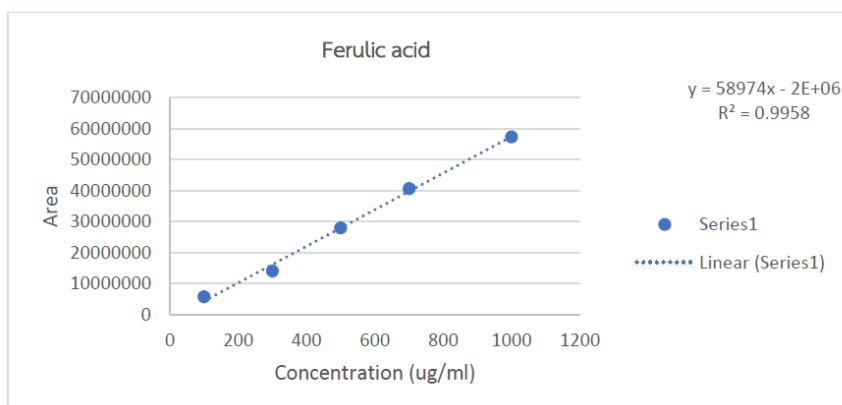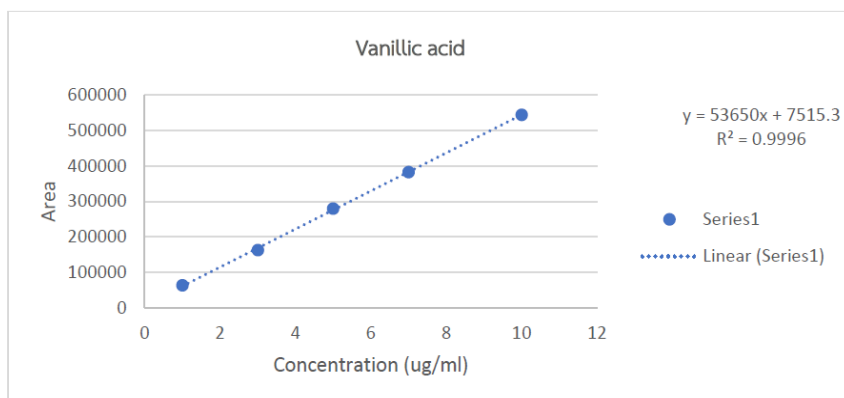

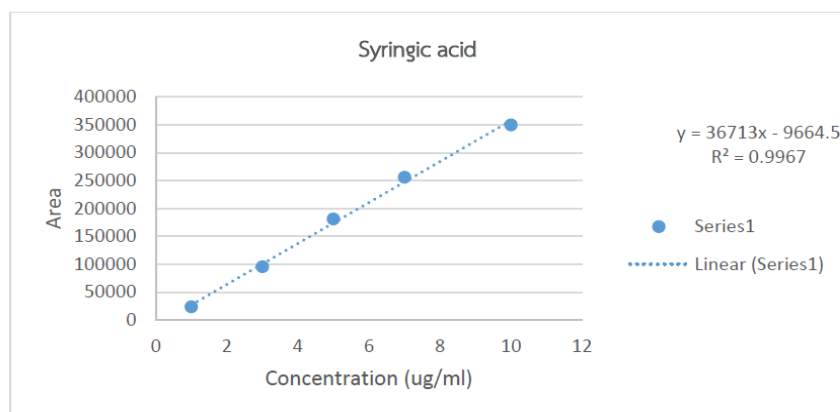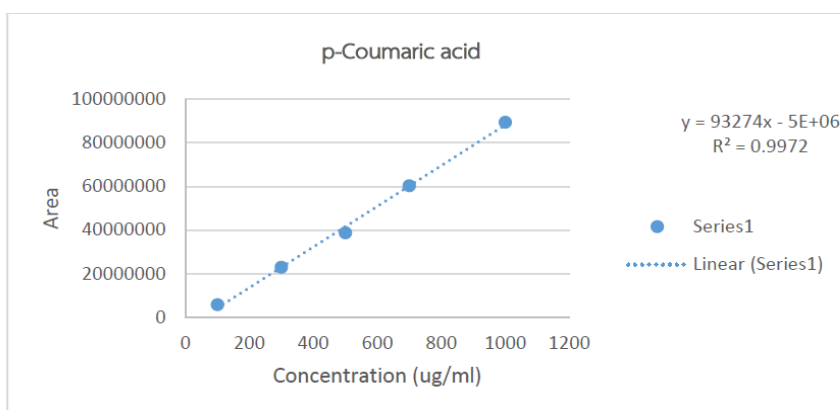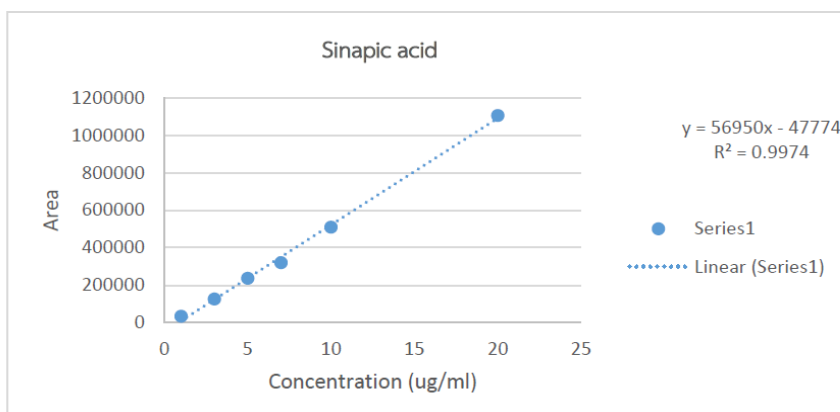

| STD                     | Ret.Time       |
|-------------------------|----------------|
| 4-Hydroxybenzoic acid   | 12.982         |
| Vanillic acid           | 15.053         |
| <i>p</i> -Coumaric acid | 16.996         |
| Ferulic acid            | 19.056, 21.374 |
| Syringic acid           | 24.938         |
| Sinapic acid            | 32.447         |
| Caffeic acid            | 43.482         |

ดัดแปลงสภาวะการวิเคราะห์จาก (Sombutsuwan และคณะ, 2021)

#### เอกสารอ้างอิง

Sombutsuwan, P., Jirattisakul, A., Nakornsadet, A., Akepratumchai, S., Chumsantea, S., Pojjanapornpun, S., Lilitchan, S., Krisnangkura, K. and Aryusuk, K., 2021, "A Simple and Efficient Method for Synthesis and Extraction of Ethyl Ferulate from  $\gamma$ -Oryzanol", **Journal of Oleo Science**, Vol. 70, No. 6, pp. 757-767.

# ==== Shimadzu LCsolution Analysis Report =====

E:\Pang\phenolic acid\2021-12-03 analyze sample\sample 1.1 3-12-2021.lcd

Acquired by : Admin  
 Sample Name : sample 1.1 3-12-2021 Mightysil 70Hex30EtAc0.2aa  
 Sample ID : sample 1.1 3-12-21  
 Tray# : 1  
 Vial # : 1  
 Injection Volume : 10 uL  
 Data File Name : sample 1.1 3-12-2021.lcd  
 Method File Name : phenolic acid 275.lcm  
 Batch File Name :  
 Report File Name : ethyl ferulate wavelength 275.lcr  
 Data Acquired : 3/12/2564 9:57:49  
 Data Processed : 21/12/2564 10:49:32

## <Chromatogram>

sample 1.1 3-12-2021 Mightysil 70Hex30EtAc0.2aa

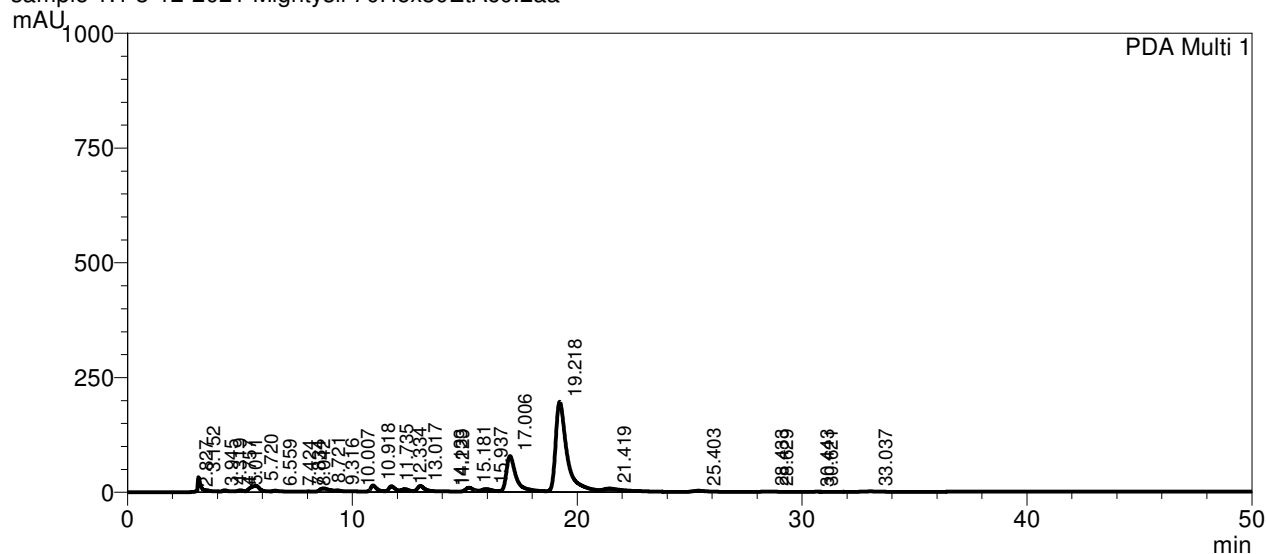

PDA Ch1 257nm 4nm

| Peak# | Ret. Time | Area    | Height | Area % | Height % |
|-------|-----------|---------|--------|--------|----------|
| 1     | 2.827     | 4023    | 405    | 0.032  | 0.097    |
| 2     | 3.152     | 415192  | 32811  | 3.288  | 7.898    |
| 3     | 3.945     | 3312    | 377    | 0.026  | 0.091    |
| 4     | 4.319     | 80409   | 4244   | 0.637  | 1.021    |
| 5     | 4.757     | 15468   | 1943   | 0.122  | 0.468    |
| 6     | 5.011     | 78094   | 4142   | 0.618  | 0.997    |
| 7     | 5.720     | 434121  | 13305  | 3.438  | 3.202    |
| 8     | 6.559     | 81992   | 2995   | 0.649  | 0.721    |
| 9     | 7.424     | 8060    | 537    | 0.064  | 0.129    |
| 10    | 7.834     | 17529   | 946    | 0.139  | 0.228    |
| 11    | 8.042     | 12214   | 1254   | 0.097  | 0.302    |
| 12    | 8.721     | 231424  | 7343   | 1.833  | 1.767    |
| 13    | 9.316     | 70738   | 3114   | 0.560  | 0.749    |
| 14    | 10.007    | 36319   | 1435   | 0.288  | 0.345    |
| 15    | 10.918    | 266549  | 13751  | 2.111  | 3.310    |
| 16    | 11.735    | 236966  | 11830  | 1.877  | 2.848    |
| 17    | 12.334    | 125713  | 5562   | 0.996  | 1.339    |
| 18    | 13.017    | 300632  | 12329  | 2.381  | 2.968    |
| 19    | 14.133    | 4439    | 379    | 0.035  | 0.091    |
| 20    | 14.229    | 3611    | 312    | 0.029  | 0.075    |
| 21    | 15.181    | 196982  | 8338   | 1.560  | 2.007    |
| 22    | 15.937    | 171365  | 5735   | 1.357  | 1.381    |
| 23    | 17.006    | 2317488 | 77321  | 18.354 | 18.611   |
| 24    | 19.218    | 7157891 | 195808 | 56.687 | 47.131   |
| 25    | 21.419    | 152197  | 3883   | 1.205  | 0.935    |
| 26    | 25.403    | 121233  | 2579   | 0.960  | 0.621    |
| 27    | 28.433    | 18709   | 706    | 0.148  | 0.170    |
| 28    | 28.629    | 16388   | 625    | 0.130  | 0.151    |
| 29    | 30.443    | 2914    | 261    | 0.023  | 0.063    |
| 30    | 30.621    | 8005    | 340    | 0.063  | 0.082    |

| Peak# | Ret. Time | Area     | Height | Area %  | Height % |
|-------|-----------|----------|--------|---------|----------|
| 31    | 33.037    | 36959    | 844    | 0.293   | 0.203    |
| Total |           | 12626931 | 415453 | 100.000 | 100.000  |

# ==== Shimadzu LCsolution Analysis Report =====

E:\Pang\phenolic acid\2021-12-03 analyze sample\sample 1.1 3-12-2021.lcd

Acquired by : Admin  
 Sample Name : sample 1.1 3-12-2021 Mightysil 70Hex30EtAc0.2aa  
 Sample ID : **sample 1.1** 3-12-21  
 Tray# : 1  
 Vial # : 1  
 Injection Volume : 10 uL  
 Data File Name : sample 1.1 3-12-2021.lcd  
 Method File Name : phenolic acid 275.lcm  
 Batch File Name :  
 Report File Name : ethyl ferulate wavelength 275.lcr  
 Data Acquired : 3/12/2564 9:57:49  
 Data Processed : 21/12/2564 10:49:32

## <Chromatogram>

sample 1.1 3-12-2021 Mightysil 70Hex30EtAc0.2aa

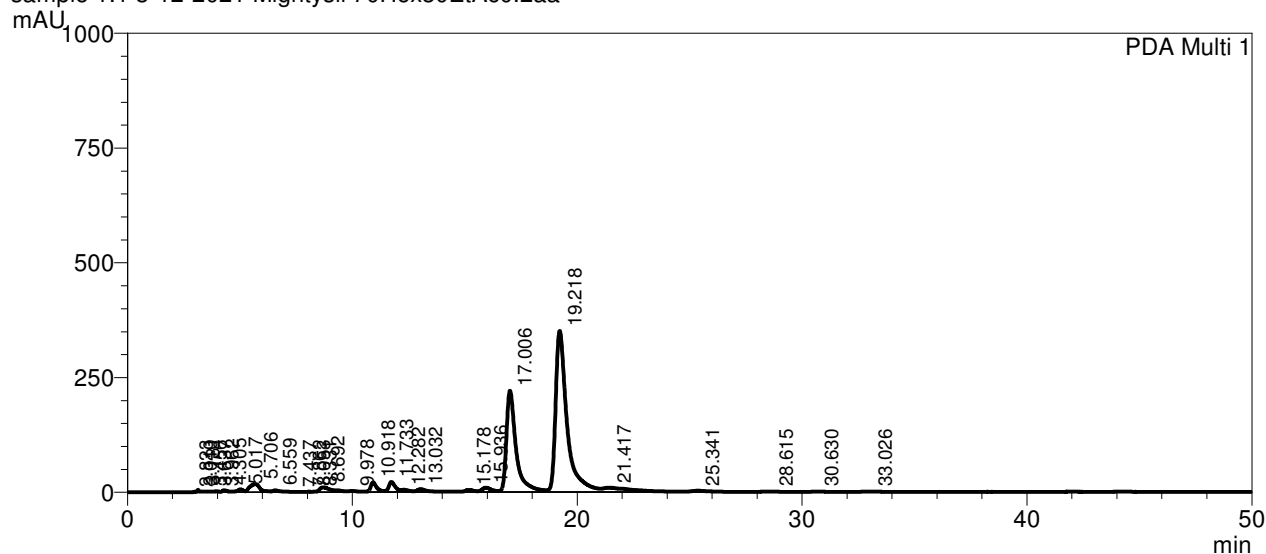

PDA Ch1 271nm 4nm

| Peak# | Ret. Time | Area     | Height | Area %  | Height % |
|-------|-----------|----------|--------|---------|----------|
| 1     | 2.823     | 3741     | 401    | 0.016   | 0.057    |
| 2     | 3.010     | 11001    | 1512   | 0.048   | 0.215    |
| 3     | 3.131     | 27489    | 5532   | 0.121   | 0.788    |
| 4     | 3.456     | 27345    | 1686   | 0.120   | 0.240    |
| 5     | 3.637     | 27908    | 1727   | 0.123   | 0.246    |
| 6     | 3.962     | 25583    | 2032   | 0.113   | 0.289    |
| 7     | 4.305     | 69989    | 4428   | 0.308   | 0.630    |
| 8     | 5.017     | 118636   | 6271   | 0.523   | 0.893    |
| 9     | 5.706     | 559624   | 17399  | 2.466   | 2.477    |
| 10    | 6.559     | 90841    | 3844   | 0.400   | 0.547    |
| 11    | 7.437     | 9736     | 519    | 0.043   | 0.074    |
| 12    | 7.862     | 4323     | 336    | 0.019   | 0.048    |
| 13    | 8.053     | 6560     | 677    | 0.029   | 0.096    |
| 14    | 8.331     | 6208     | 571    | 0.027   | 0.081    |
| 15    | 8.692     | 376319   | 9974   | 1.658   | 1.420    |
| 16    | 9.978     | 47372    | 2043   | 0.209   | 0.291    |
| 17    | 10.918    | 380138   | 20383  | 1.675   | 2.902    |
| 18    | 11.733    | 431162   | 21444  | 1.900   | 3.053    |
| 19    | 12.282    | 93499    | 4182   | 0.412   | 0.595    |
| 20    | 13.032    | 137444   | 5586   | 0.606   | 0.795    |
| 21    | 15.178    | 92299    | 4004   | 0.407   | 0.570    |
| 22    | 15.936    | 249425   | 8917   | 1.099   | 1.270    |
| 23    | 17.006    | 6542344  | 220018 | 28.825  | 31.325   |
| 24    | 19.218    | 12926605 | 350623 | 56.953  | 49.920   |
| 25    | 21.417    | 179585   | 3275   | 0.791   | 0.466    |
| 26    | 25.341    | 115742   | 2251   | 0.510   | 0.321    |
| 27    | 28.615    | 52479    | 896    | 0.231   | 0.128    |
| 28    | 30.630    | 31971    | 783    | 0.141   | 0.111    |
| 29    | 33.026    | 51627    | 1049   | 0.227   | 0.149    |
| Total |           | 22696994 | 702364 | 100.000 | 100.000  |

# ==== Shimadzu LCsolution Analysis Report =====

E:\Pang\phenolic acid\2021-12-03 analyze sample\sample 1.1 3-12-2021.lcd

Acquired by : Admin  
 Sample Name : sample 1.1 3-12-2021 Mightysil 70Hex30EtAc0.2aa  
 Sample ID : **sample 1.1** 3-12-21  
 Tray# : 1  
 Vial # : 1  
 Injection Volume : 10 uL  
 Data File Name : sample 1.1 3-12-2021.lcd  
 Method File Name : phenolic acid 275.lcm  
 Batch File Name :  
 Report File Name : ethyl ferulate wavelength 275.lcr  
 Data Acquired : 3/12/2564 9:57:49  
 Data Processed : 21/12/2564 10:49:32

## <Chromatogram>

sample 1.1 3-12-2021 Mightysil 70Hex30EtAc0.2aa

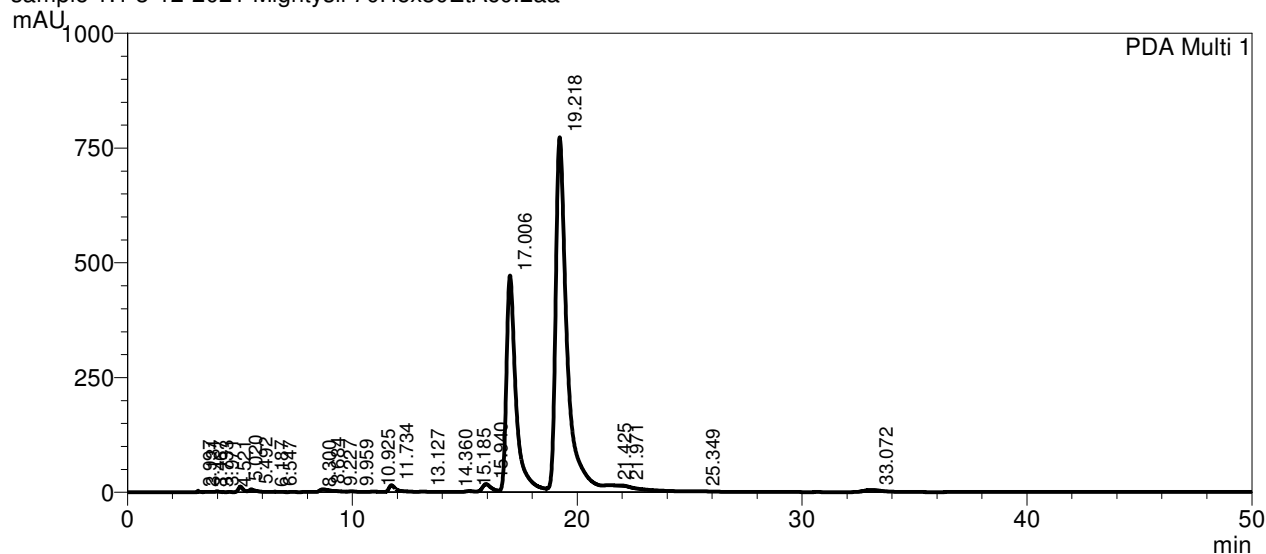

PDA Ch1 300nm 4nm

| Peak# | Ret. Time | Area     | Height  | Area %  | Height % |
|-------|-----------|----------|---------|---------|----------|
| 1     | 2.997     | 1210     | 118     | 0.003   | 0.009    |
| 2     | 3.131     | 14160    | 3563    | 0.032   | 0.269    |
| 3     | 3.467     | 6547     | 374     | 0.015   | 0.028    |
| 4     | 3.733     | 3080     | 323     | 0.007   | 0.024    |
| 5     | 3.971     | 17389    | 1709    | 0.039   | 0.129    |
| 6     | 4.521     | 1871     | 173     | 0.004   | 0.013    |
| 7     | 5.020     | 177841   | 11953   | 0.400   | 0.901    |
| 8     | 5.492     | 122599   | 6046    | 0.275   | 0.456    |
| 9     | 6.187     | 9615     | 657     | 0.022   | 0.050    |
| 10    | 6.547     | 14812    | 781     | 0.033   | 0.059    |
| 11    | 8.300     | 6637     | 395     | 0.015   | 0.030    |
| 12    | 8.684     | 172929   | 5728    | 0.389   | 0.432    |
| 13    | 9.227     | 39137    | 2192    | 0.088   | 0.165    |
| 14    | 9.959     | 25981    | 1442    | 0.058   | 0.109    |
| 15    | 10.925    | 14251    | 775     | 0.032   | 0.058    |
| 16    | 11.734    | 326839   | 14650   | 0.734   | 1.104    |
| 17    | 13.127    | 16188    | 679     | 0.036   | 0.051    |
| 18    | 14.360    | 6477     | 328     | 0.015   | 0.025    |
| 19    | 15.185    | 41989    | 1881    | 0.094   | 0.142    |
| 20    | 15.940    | 481053   | 17133   | 1.081   | 1.292    |
| 21    | 17.006    | 13997071 | 471647  | 31.449  | 35.559   |
| 22    | 19.218    | 28526357 | 772346  | 64.094  | 58.230   |
| 23    | 21.425    | 82698    | 2412    | 0.186   | 0.182    |
| 24    | 21.971    | 105217   | 3557    | 0.236   | 0.268    |
| 25    | 25.349    | 31135    | 764     | 0.070   | 0.058    |
| 26    | 33.072    | 263660   | 4746    | 0.592   | 0.358    |
| Total |           | 44506743 | 1326369 | 100.000 | 100.000  |

# ==== Shimadzu LCsolution Analysis Report =====

E:\Pang\phenolic acid\2021-12-03 analyze sample\sample 1.1 3-12-2021.lcd

Acquired by : Admin  
 Sample Name : sample 1.1 3-12-2021 Mightysil 70Hex30EtAc0.2aa  
 Sample ID : **sample 1.1** 3-12-21  
 Tray# : 1  
 Vial # : 1  
 Injection Volume : 10 uL  
 Data File Name : sample 1.1 3-12-2021.lcd  
 Method File Name : phenolic acid 275.lcm  
 Batch File Name :  
 Report File Name : ethyl ferulate wavelength 275.lcr  
 Data Acquired : 3/12/2564 9:57:49  
 Data Processed : 21/12/2564 10:49:32

## <Chromatogram>

sample 1.1 3-12-2021 Mightysil 70Hex30EtAc0.2aa

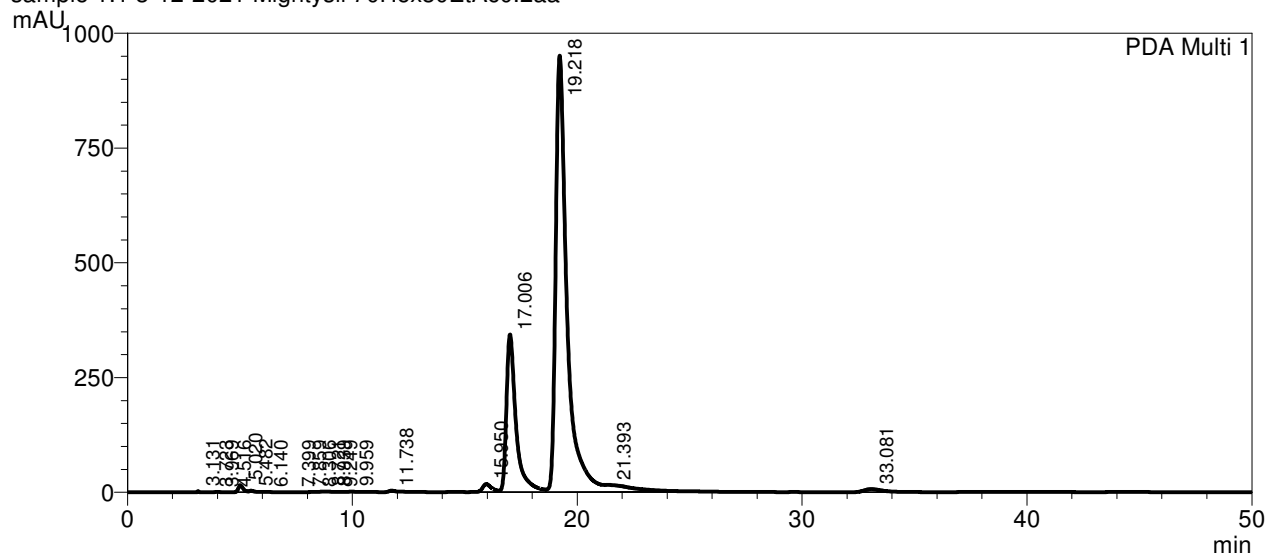

PDA Ch1 320nm 4nm

| Peak# | Ret. Time | Area     | Height  | Area %  | Height % |
|-------|-----------|----------|---------|---------|----------|
| 1     | 3.131     | 9458     | 2998    | 0.021   | 0.222    |
| 2     | 3.723     | 1055     | 113     | 0.002   | 0.008    |
| 3     | 3.969     | 11242    | 1013    | 0.024   | 0.075    |
| 4     | 4.516     | 2446     | 216     | 0.005   | 0.016    |
| 5     | 5.020     | 229044   | 14950   | 0.499   | 1.107    |
| 6     | 5.482     | 52250    | 3390    | 0.114   | 0.251    |
| 7     | 6.140     | 10765    | 512     | 0.023   | 0.038    |
| 8     | 7.399     | 2395     | 171     | 0.005   | 0.013    |
| 9     | 7.859     | 1483     | 132     | 0.003   | 0.010    |
| 10    | 8.306     | 6653     | 416     | 0.014   | 0.031    |
| 11    | 8.721     | 22819    | 1073    | 0.050   | 0.079    |
| 12    | 8.939     | 12358    | 957     | 0.027   | 0.071    |
| 13    | 9.249     | 13834    | 698     | 0.030   | 0.052    |
| 14    | 9.959     | 22217    | 1398    | 0.048   | 0.104    |
| 15    | 11.738    | 86016    | 3244    | 0.187   | 0.240    |
| 16    | 15.950    | 482489   | 17353   | 1.050   | 1.285    |
| 17    | 17.006    | 10200369 | 343232  | 22.202  | 25.425   |
| 18    | 19.218    | 34302873 | 950418  | 74.662  | 70.403   |
| 19    | 21.393    | 84045    | 938     | 0.183   | 0.070    |
| 20    | 33.081    | 390186   | 6742    | 0.849   | 0.499    |
| Total |           | 45943995 | 1349963 | 100.000 | 100.000  |



# ==== Shimadzu LCsolution Analysis Report =====

E:\Pang\phenolic acid\2021-12-03 analyze sample\sample 1.2\_3-12-2021.lcd  
 Acquired by : Admin  
 Sample Name : sample 1.2\_3-12-2021\_Mightysil\_70Hex-30EtAc-0.2aa  
 Sample ID : sample 1.2\_3-12-21  
 Tray# : 1  
 Vial # : 1  
 Injection Volume : 10 uL  
 Data File Name : sample 1.2\_3-12-2021.lcd  
 Method File Name : phenolic acid 275.lcm  
 Batch File Name :  
 Report File Name : ethyl ferulate wavelength 275.lcr  
 Data Acquired : 3/12/2564 11:39:23  
 Data Processed : 21/12/2564 10:51:57

## <Chromatogram>

sample 1.2\_3-12-2021\_Mightysil\_70Hex-30EtAc-0.2aa

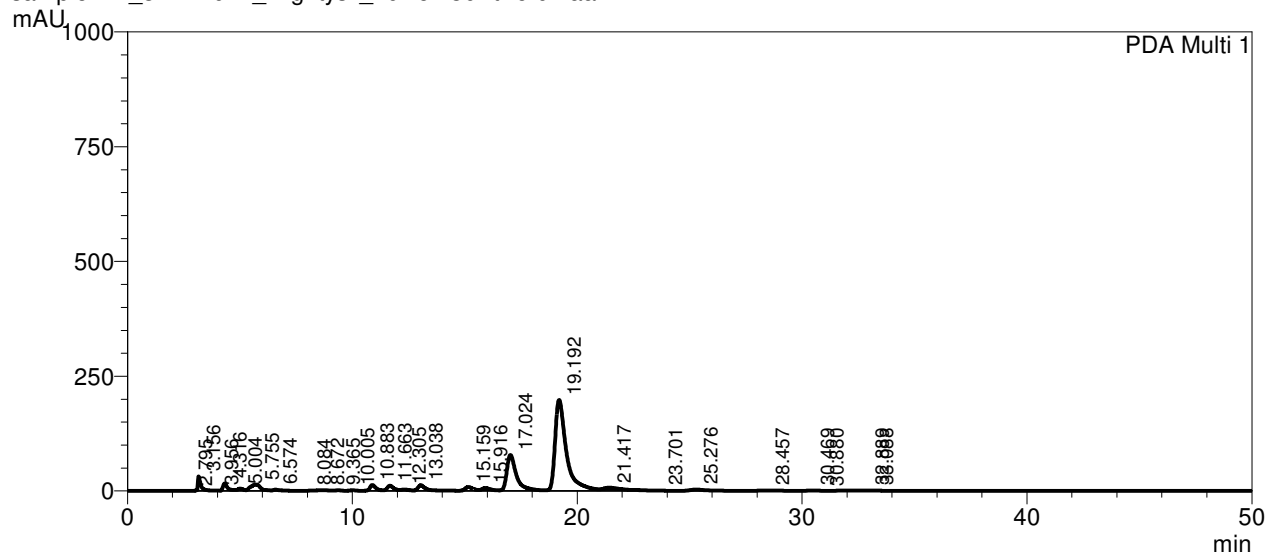

1 PDA Multi 1/257nm 4nm

PDA Ch1 257nm 4nm

| Peak# | Ret. Time | Area     | Height | Area %  | Height % |
|-------|-----------|----------|--------|---------|----------|
| 1     | 2.795     | 2697     | 251    | 0.022   | 0.061    |
| 2     | 3.156     | 341550   | 31920  | 2.735   | 7.717    |
| 3     | 3.956     | 1889     | 200    | 0.015   | 0.048    |
| 4     | 4.316     | 240859   | 16430  | 1.929   | 3.972    |
| 5     | 5.004     | 106495   | 5405   | 0.853   | 1.307    |
| 6     | 5.755     | 438598   | 13725  | 3.512   | 3.318    |
| 7     | 6.574     | 58703    | 2660   | 0.470   | 0.643    |
| 8     | 8.084     | 5115     | 639    | 0.041   | 0.155    |
| 9     | 8.672     | 50963    | 1315   | 0.408   | 0.318    |
| 10    | 9.365     | 22314    | 1104   | 0.179   | 0.267    |
| 11    | 10.005    | 21168    | 1040   | 0.170   | 0.251    |
| 12    | 10.883    | 237325   | 12731  | 1.900   | 3.078    |
| 13    | 11.663    | 231570   | 11134  | 1.854   | 2.692    |
| 14    | 12.305    | 72169    | 2950   | 0.578   | 0.713    |
| 15    | 13.038    | 305940   | 12138  | 2.450   | 2.935    |
| 16    | 15.159    | 207222   | 8362   | 1.659   | 2.022    |
| 17    | 15.916    | 172623   | 5968   | 1.382   | 1.443    |
| 18    | 17.024    | 2340767  | 78167  | 18.744  | 18.899   |
| 19    | 19.192    | 7246447  | 198106 | 58.026  | 47.897   |
| 20    | 21.417    | 161675   | 3963   | 1.295   | 0.958    |
| 21    | 23.701    | 2599     | -7     | 0.021   | -0.002   |
| 22    | 25.276    | 134818   | 2832   | 1.080   | 0.685    |
| 23    | 28.457    | 47594    | 908    | 0.381   | 0.220    |
| 24    | 30.469    | 12420    | 380    | 0.099   | 0.092    |
| 25    | 30.880    | 1196     | 162    | 0.010   | 0.039    |
| 26    | 32.889    | 14836    | 593    | 0.119   | 0.143    |
| 27    | 33.088    | 8701     | 533    | 0.070   | 0.129    |
| Total |           | 12488253 | 413611 | 100.000 | 100.000  |

# ==== Shimadzu LCsolution Analysis Report =====

Acquired by : Admin  
 Sample Name : sample 1.2\_3-12-2021\_Mightysil\_70Hex-30EtAc-0.2aa  
 Sample ID : sample 1.2\_3-12-21  
 Tray# : 1  
 Vail # : 1  
 Injection Volume : 10 uL  
 Data File Name : sample 1.2\_3-12-2021.lcd  
 Method File Name : phenolic acid 275.lcm  
 Batch File Name :  
 Report File Name : ethyl ferulate wavelength 275.lcr  
 Data Acquired : 3/12/2564 11:39:23  
 Data Processed : 21/12/2564 10:51:57

## <Chromatogram>

sample 1.2\_3-12-2021\_Mightysil\_70Hex-30EtAc-0.2aa

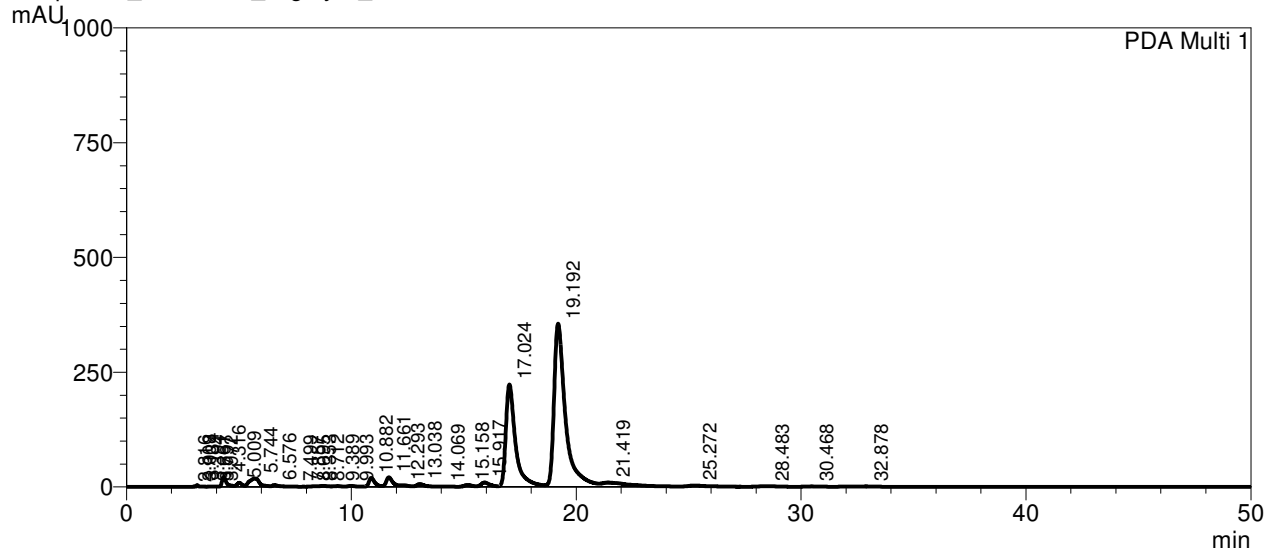

1 PDA Multi 1/271nm 4nm

PDA Ch1 271nm 4nm

| Peak# | Ret. Time | Area     | Height | Area % | Height % |
|-------|-----------|----------|--------|--------|----------|
| 1     | 2.816     | 2945     | 300    | 0.013  | 0.042    |
| 2     | 3.008     | 9970     | 1387   | 0.044  | 0.193    |
| 3     | 3.134     | 23464    | 4602   | 0.102  | 0.640    |
| 4     | 3.394     | 12636    | 980    | 0.055  | 0.136    |
| 5     | 3.661     | 8369     | 824    | 0.037  | 0.115    |
| 6     | 3.797     | 4325     | 772    | 0.019  | 0.107    |
| 7     | 3.972     | 14543    | 1048   | 0.064  | 0.146    |
| 8     | 4.316     | 317133   | 21714  | 1.385  | 3.021    |
| 9     | 5.009     | 153760   | 8887   | 0.671  | 1.236    |
| 10    | 5.744     | 594444   | 18316  | 2.596  | 2.548    |
| 11    | 6.576     | 95066    | 3958   | 0.415  | 0.551    |
| 12    | 7.499     | 8903     | 482    | 0.039  | 0.067    |
| 13    | 7.857     | 4385     | 367    | 0.019  | 0.051    |
| 14    | 8.095     | 8543     | 932    | 0.037  | 0.130    |
| 15    | 8.353     | 19412    | 1211   | 0.085  | 0.169    |
| 16    | 8.712     | 53686    | 1937   | 0.234  | 0.270    |
| 17    | 9.389     | 39098    | 1623   | 0.171  | 0.226    |
| 18    | 9.993     | 41881    | 1885   | 0.183  | 0.262    |
| 19    | 10.882    | 355500   | 19233  | 1.553  | 2.676    |
| 20    | 11.661    | 423626   | 20433  | 1.850  | 2.843    |
| 21    | 12.293    | 79135    | 3336   | 0.346  | 0.464    |
| 22    | 13.038    | 135689   | 5810   | 0.593  | 0.808    |
| 23    | 14.069    | 1044     | 93     | 0.005  | 0.013    |
| 24    | 15.158    | 92081    | 3953   | 0.402  | 0.550    |
| 25    | 15.917    | 246796   | 9138   | 1.078  | 1.271    |
| 26    | 17.024    | 6642249  | 222700 | 29.008 | 30.982   |
| 27    | 19.192    | 13132682 | 354922 | 57.353 | 49.377   |
| 28    | 21.419    | 143677   | 3155   | 0.627  | 0.439    |

| Peak# | Ret. Time | Area     | Height | Area %  | Height % |
|-------|-----------|----------|--------|---------|----------|
| 29    | 25.272    | 115327   | 2294   | 0.504   | 0.319    |
| 30    | 28.483    | 64071    | 1161   | 0.280   | 0.162    |
| 31    | 30.468    | 31256    | 773    | 0.136   | 0.108    |
| 32    | 32.878    | 22407    | 578    | 0.098   | 0.080    |
| Total |           | 22898105 | 718803 | 100.000 | 100.000  |

# ==== Shimadzu LCsolution Analysis Report =====

E:\Pang\phenolic acid\2021-12-03 analyze sample\sample 1.2\_3-12-2021.lcd

Acquired by : Admin  
 Sample Name : sample 1.2\_3-12-2021\_Mightysil\_70Hex-30EtAc-0.2aa  
 Sample ID : sample 1.2\_3-12-21  
 Tray# : 1  
 Vial # : 1  
 Injection Volume : 10 uL  
 Data File Name : sample 1.2\_3-12-2021.lcd  
 Method File Name : phenolic acid 275.lcm  
 Batch File Name :  
 Report File Name : ethyl ferulate wavelength 275.lcr  
 Data Acquired : 3/12/2564 11:39:23  
 Data Processed : 21/12/2564 10:51:57

## <Chromatogram>

sample 1.2\_3-12-2021\_Mightysil\_70Hex-30EtAc-0.2aa

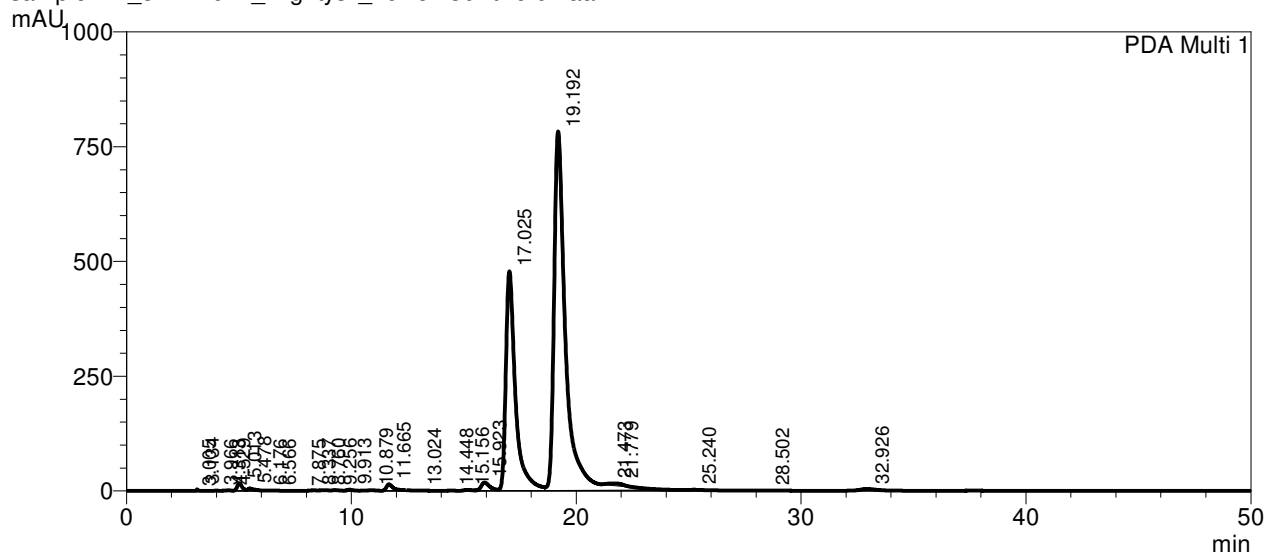

1 PDA Multi 1/300nm 4nm

PDA Ch1 300nm 4nm

| Peak# | Ret. Time | Area     | Height  | Area %  | Height % |
|-------|-----------|----------|---------|---------|----------|
| 1     | 3.005     | 1169     | 149     | 0.003   | 0.011    |
| 2     | 3.134     | 16779    | 3375    | 0.038   | 0.251    |
| 3     | 3.966     | 13313    | 813     | 0.030   | 0.060    |
| 4     | 4.313     | 5532     | 568     | 0.012   | 0.042    |
| 5     | 4.529     | 18239    | 1313    | 0.041   | 0.098    |
| 6     | 5.013     | 258485   | 16780   | 0.578   | 1.247    |
| 7     | 5.478     | 114866   | 5470    | 0.257   | 0.407    |
| 8     | 6.176     | 12929    | 825     | 0.029   | 0.061    |
| 9     | 6.566     | 14607    | 795     | 0.033   | 0.059    |
| 10    | 7.875     | 3513     | 250     | 0.008   | 0.019    |
| 11    | 8.337     | 24167    | 1188    | 0.054   | 0.088    |
| 12    | 8.760     | 37196    | 1376    | 0.083   | 0.102    |
| 13    | 9.256     | 32350    | 1633    | 0.072   | 0.121    |
| 14    | 9.913     | 44054    | 2474    | 0.098   | 0.184    |
| 15    | 10.879    | 36241    | 1255    | 0.081   | 0.093    |
| 16    | 11.665    | 347494   | 14188   | 0.777   | 1.054    |
| 17    | 13.024    | 8175     | 489     | 0.018   | 0.036    |
| 18    | 14.448    | 7392     | 390     | 0.017   | 0.029    |
| 19    | 15.156    | 43267    | 1866    | 0.097   | 0.139    |
| 20    | 15.923    | 473824   | 17642   | 1.059   | 1.311    |
| 21    | 17.025    | 14195548 | 477643  | 31.732  | 35.497   |
| 22    | 19.192    | 28553398 | 782250  | 63.826  | 58.134   |
| 23    | 21.473    | 60814    | 3207    | 0.136   | 0.238    |
| 24    | 21.779    | 172221   | 4734    | 0.385   | 0.352    |
| 25    | 25.240    | 27934    | 780     | 0.062   | 0.058    |
| 26    | 28.502    | 20358    | 486     | 0.046   | 0.036    |
| 27    | 32.926    | 192447   | 3648    | 0.430   | 0.271    |
| Total |           | 44736310 | 1345588 | 100.000 | 100.000  |

# ==== Shimadzu LCsolution Analysis Report =====

E:\Pang\phenolic acid\2021-12-03 analyze sample\sample 1.2\_3-12-2021.lcd  
 Acquired by : Admin  
 Sample Name : sample 1.2\_3-12-2021\_Mightysil\_70Hex-30EtAc-0.2aa  
 Sample ID : sample 1.2\_3-12-21  
 Tray# : 1  
 Vial # : 1  
 Injection Volume : 10 uL  
 Data File Name : sample 1.2\_3-12-2021.lcd  
 Method File Name : phenolic acid 275.lcm  
 Batch File Name :  
 Report File Name : ethyl ferulate wavelength 275.lcr  
 Data Acquired : 3/12/2564 11:39:23  
 Data Processed : 21/12/2564 10:51:57

## <Chromatogram>

sample 1.2\_3-12-2021\_Mightysil\_70Hex-30EtAc-0.2aa

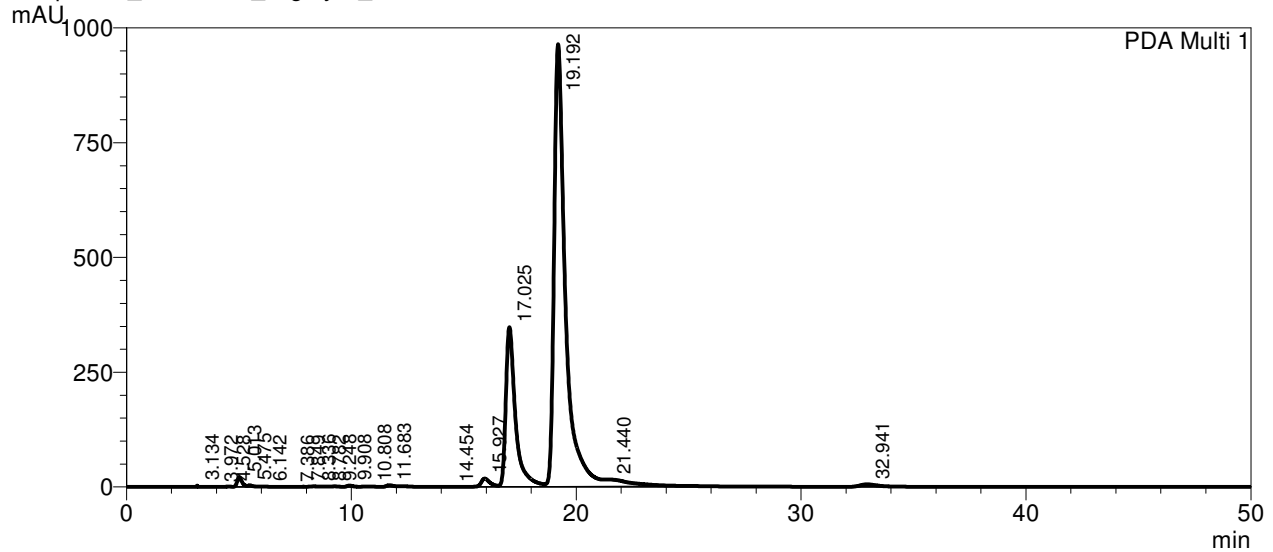

1 PDA Multi 1/320nm 4nm

PDA Ch1 320nm 4nm

| Peak# | Ret. Time | Area     | Height  | Area %  | Height % |
|-------|-----------|----------|---------|---------|----------|
| 1     | 3.134     | 13825    | 3060    | 0.030   | 0.222    |
| 2     | 3.972     | 8926     | 508     | 0.019   | 0.037    |
| 3     | 4.528     | 16226    | 1100    | 0.035   | 0.080    |
| 4     | 5.013     | 324562   | 20875   | 0.694   | 1.517    |
| 5     | 5.475     | 54560    | 3562    | 0.117   | 0.259    |
| 6     | 6.142     | 13072    | 606     | 0.028   | 0.044    |
| 7     | 7.386     | 3336     | 216     | 0.007   | 0.016    |
| 8     | 7.849     | 5119     | 329     | 0.011   | 0.024    |
| 9     | 8.336     | 25371    | 1168    | 0.054   | 0.085    |
| 10    | 8.782     | 20676    | 857     | 0.044   | 0.062    |
| 11    | 9.248     | 20409    | 1114    | 0.044   | 0.081    |
| 12    | 9.908     | 51318    | 3001    | 0.110   | 0.218    |
| 13    | 10.808    | 21750    | 600     | 0.046   | 0.044    |
| 14    | 11.683    | 59990    | 3036    | 0.128   | 0.221    |
| 15    | 14.454    | 4226     | 217     | 0.009   | 0.016    |
| 16    | 15.927    | 486367   | 17974   | 1.040   | 1.306    |
| 17    | 17.025    | 10366027 | 347737  | 22.157  | 25.264   |
| 18    | 19.192    | 34865337 | 963340  | 74.522  | 69.989   |
| 19    | 21.440    | 100394   | 1668    | 0.215   | 0.121    |
| 20    | 32.941    | 323856   | 5456    | 0.692   | 0.396    |
| Total |           | 46785347 | 1376423 | 100.000 | 100.000  |

# ==== Shimadzu LCsolution Analysis Report =====

E:\Pang\phenolic acid\2021-12-03 analyze sample\sample 2.1\_3-12-2021.lcd

Acquired by : Admin  
 Sample Name : sample 2.1\_3-12-2021\_Mightysil\_70Hex-30EtAc-0.2aa  
 Sample ID : sample 2.1\_3-12-21  
 Tray# : 1  
 Vial # : 1  
 Injection Volume : 10 uL  
 Data File Name : sample 2.1\_3-12-2021.lcd  
 Method File Name : phenolic acid 275.lcm  
 Batch File Name :  
 Report File Name : ethyl ferulate wavelength 275.lcr  
 Data Acquired : 3/12/2564 12:35:48  
 Data Processed : 21/12/2564 10:53:28

## <Chromatogram>

sample 2.1\_3-12-2021\_Mightysil\_70Hex-30EtAc-0.2aa

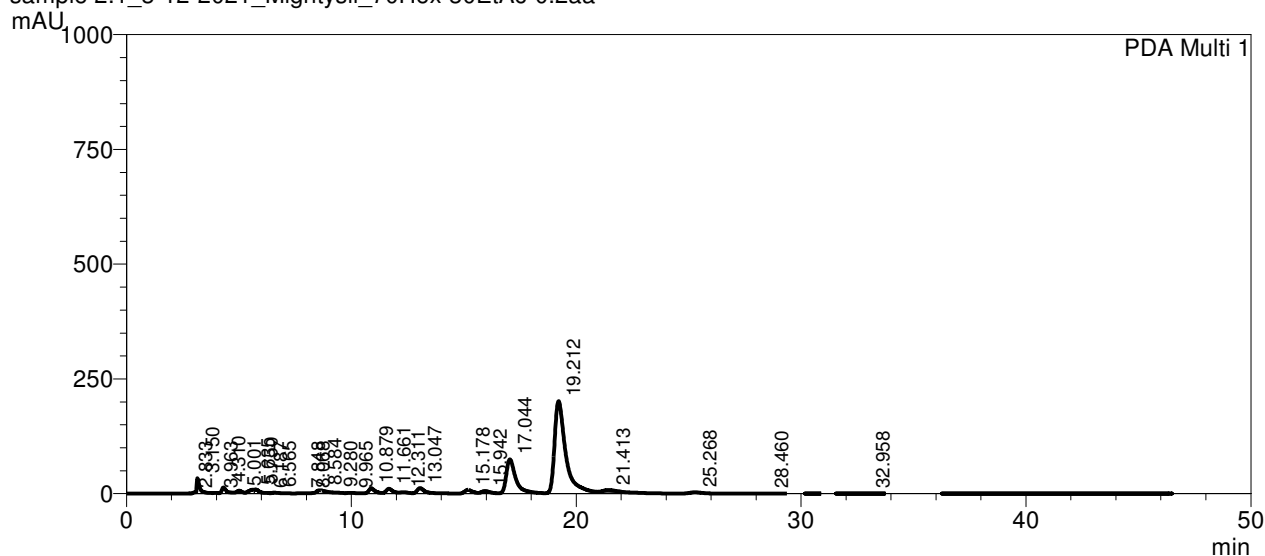

1 PDA Multi 1/257nm 4nm

PDA Ch1 257nm 4nm

| Peak# | Ret. Time | Area     | Height | Area %  | Height % |
|-------|-----------|----------|--------|---------|----------|
| 1     | 2.833     | 10811    | 869    | 0.087   | 0.207    |
| 2     | 3.150     | 397795   | 33626  | 3.188   | 7.998    |
| 3     | 3.963     | 4640     | 518    | 0.037   | 0.123    |
| 4     | 4.310     | 213319   | 13215  | 1.709   | 3.143    |
| 5     | 5.001     | 117223   | 6437   | 0.939   | 1.531    |
| 6     | 5.635     | 145622   | 8546   | 1.167   | 2.033    |
| 7     | 5.750     | 131957   | 8720   | 1.057   | 2.074    |
| 8     | 6.187     | 18498    | 1517   | 0.148   | 0.361    |
| 9     | 6.565     | 46384    | 1953   | 0.372   | 0.464    |
| 10    | 7.848     | 4990     | 347    | 0.040   | 0.083    |
| 11    | 8.068     | 4363     | 545    | 0.035   | 0.130    |
| 12    | 8.584     | 227877   | 6920   | 1.826   | 1.646    |
| 13    | 9.280     | 41920    | 2105   | 0.336   | 0.501    |
| 14    | 9.965     | 31718    | 1101   | 0.254   | 0.262    |
| 15    | 10.879    | 220244   | 11351  | 1.765   | 2.700    |
| 16    | 11.661    | 210826   | 10089  | 1.689   | 2.400    |
| 17    | 12.311    | 68011    | 2837   | 0.545   | 0.675    |
| 18    | 13.047    | 278389   | 11752  | 2.231   | 2.795    |
| 19    | 15.178    | 190474   | 8051   | 1.526   | 1.915    |
| 20    | 15.942    | 152909   | 5560   | 1.225   | 1.322    |
| 21    | 17.044    | 2206977  | 74483  | 17.685  | 17.715   |
| 22    | 19.212    | 7373402  | 201123 | 59.083  | 47.836   |
| 23    | 21.413    | 184676   | 4433   | 1.480   | 1.054    |
| 24    | 25.268    | 124351   | 2821   | 0.996   | 0.671    |
| 25    | 28.460    | 44335    | 871    | 0.355   | 0.207    |
| 26    | 32.958    | 27961    | 654    | 0.224   | 0.156    |
| Total |           | 12479671 | 420446 | 100.000 | 100.000  |

# ==== Shimadzu LCsolution Analysis Report =====

E:\Pang\phenolic acid\2021-12-03 analyze sample\sample 2.1\_3-12-2021.lcd

Acquired by : Admin  
 Sample Name : sample 2.1\_3-12-2021\_Mightysil\_70Hex-30EtAc-0.2aa  
 Sample ID : sample 2.1\_3-12-21  
 Tray# : 1  
 Vial # : 1  
 Injection Volume : 10 uL  
 Data File Name : sample 2.1\_3-12-2021.lcd  
 Method File Name : phenolic acid 275.lcm  
 Batch File Name :  
 Report File Name : ethyl ferulate wavelength 275.lcr  
 Data Acquired : 3/12/2564 12:35:48  
 Data Processed : 21/12/2564 10:53:28

## <Chromatogram>

sample 2.1\_3-12-2021\_Mightysil\_70Hex-30EtAc-0.2aa

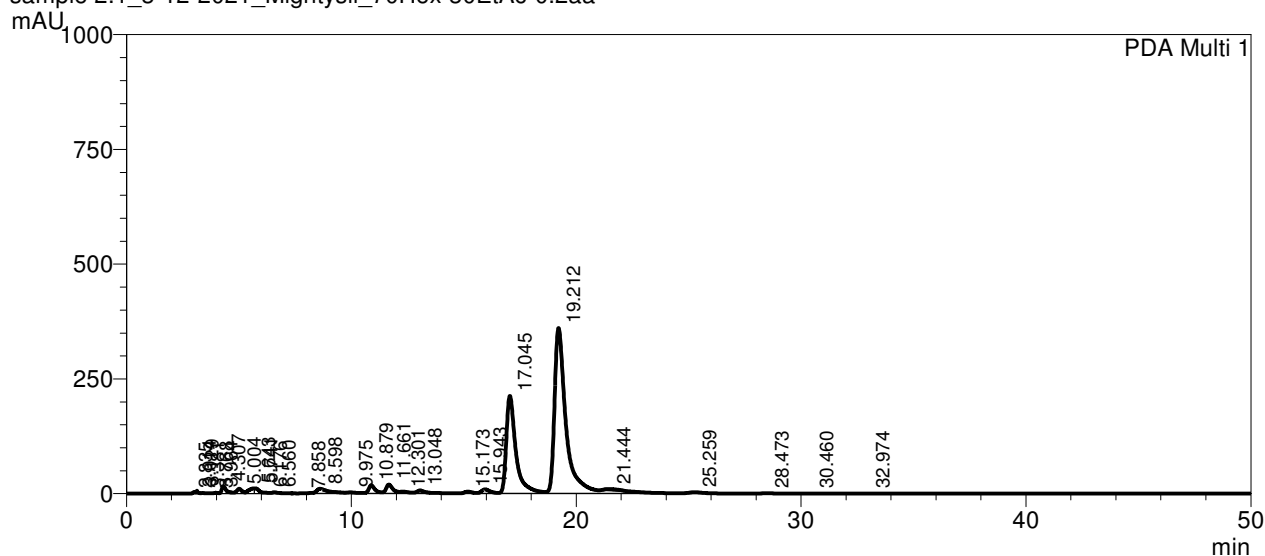

1 PDA Multi 1/271nm 4nm

PDA Ch1 271nm 4nm

| Peak# | Ret. Time | Area     | Height | Area % | Height % |
|-------|-----------|----------|--------|--------|----------|
| 1     | 2.835     | 7325     | 751    | 0.032  | 0.104    |
| 2     | 3.014     | 29477    | 3709   | 0.130  | 0.514    |
| 3     | 3.129     | 33778    | 6684   | 0.149  | 0.926    |
| 4     | 3.381     | 20785    | 1529   | 0.092  | 0.212    |
| 5     | 3.768     | 17624    | 1208   | 0.078  | 0.167    |
| 6     | 3.964     | 25933    | 2044   | 0.114  | 0.283    |
| 7     | 4.307     | 244834   | 16348  | 1.081  | 2.266    |
| 8     | 5.004     | 176381   | 10524  | 0.779  | 1.459    |
| 9     | 5.643     | 190176   | 11114  | 0.840  | 1.540    |
| 10    | 5.741     | 165092   | 11273  | 0.729  | 1.562    |
| 11    | 6.176     | 22912    | 1802   | 0.101  | 0.250    |
| 12    | 6.560     | 53910    | 2543   | 0.238  | 0.353    |
| 13    | 7.858     | 2188     | 239    | 0.010  | 0.033    |
| 14    | 8.598     | 393095   | 9825   | 1.735  | 1.362    |
| 15    | 9.975     | 60270    | 1997   | 0.266  | 0.277    |
| 16    | 10.879    | 346945   | 17461  | 1.532  | 2.420    |
| 17    | 11.661    | 406834   | 19032  | 1.796  | 2.638    |
| 18    | 12.301    | 90470    | 3582   | 0.399  | 0.496    |
| 19    | 13.048    | 159770   | 6115   | 0.705  | 0.847    |
| 20    | 15.173    | 86719    | 3807   | 0.383  | 0.528    |
| 21    | 15.943    | 228199   | 8755   | 1.007  | 1.213    |
| 22    | 17.045    | 6286278  | 212408 | 27.751 | 29.439   |
| 23    | 19.212    | 13164239 | 359877 | 58.114 | 49.877   |
| 24    | 21.444    | 213309   | 3979   | 0.942  | 0.551    |
| 25    | 25.259    | 107084   | 2346   | 0.473  | 0.325    |
| 26    | 28.473    | 54403    | 1051   | 0.240  | 0.146    |
| 27    | 30.460    | 37356    | 876    | 0.165  | 0.121    |

| Peak# | Ret. Time | Area     | Height | Area %  | Height % |
|-------|-----------|----------|--------|---------|----------|
| 28    | 32.974    | 27116    | 646    | 0.120   | 0.090    |
| Total |           | 22652503 | 721525 | 100.000 | 100.000  |



# ==== Shimadzu LCsolution Analysis Report =====

E:\Pang\phenolic acid\2021-12-03 analyze sample\sample 2.1\_3-12-2021.lcd

Acquired by : Admin  
 Sample Name : sample 2.1\_3-12-2021\_Mightysil\_70Hex-30EtAc-0.2aa  
 Sample ID : sample 2.1\_3-12-21  
 Tray# : 1  
 Vial # : 1  
 Injection Volume : 10 uL  
 Data File Name : sample 2.1\_3-12-2021.lcd  
 Method File Name : phenolic acid 275.lcm  
 Batch File Name :  
 Report File Name : ethyl ferulate wavelength 275.lcr  
 Data Acquired : 3/12/2564 12:35:48  
 Data Processed : 21/12/2564 10:53:28

## <Chromatogram>

sample 2.1\_3-12-2021\_Mightysil\_70Hex-30EtAc-0.2aa

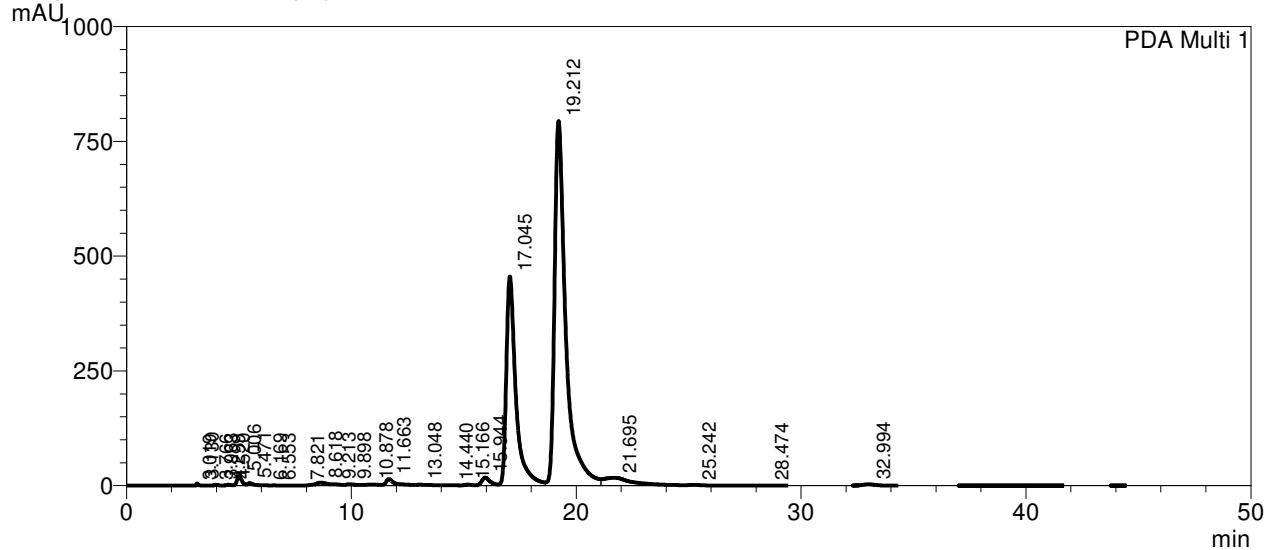

1 PDA Multi 1/300nm 4nm

PDA Ch1 300nm 4nm

| Peak# | Ret. Time | Area     | Height  | Area %  | Height % |
|-------|-----------|----------|---------|---------|----------|
| 1     | 3.019     | 5607     | 469     | 0.012   | 0.034    |
| 2     | 3.130     | 31451    | 5453    | 0.069   | 0.398    |
| 3     | 3.766     | 6506     | 705     | 0.014   | 0.051    |
| 4     | 3.963     | 27102    | 2195    | 0.059   | 0.160    |
| 5     | 4.299     | 6135     | 689     | 0.013   | 0.050    |
| 6     | 4.520     | 34134    | 2277    | 0.075   | 0.166    |
| 7     | 5.006     | 327945   | 21311   | 0.716   | 1.557    |
| 8     | 5.471     | 108531   | 6187    | 0.237   | 0.452    |
| 9     | 6.169     | 14547    | 875     | 0.032   | 0.064    |
| 10    | 6.553     | 12667    | 625     | 0.028   | 0.046    |
| 11    | 7.821     | 8042     | 482     | 0.018   | 0.035    |
| 12    | 8.618     | 253561   | 6615    | 0.554   | 0.483    |
| 13    | 9.213     | 81863    | 3212    | 0.179   | 0.235    |
| 14    | 9.898     | 108495   | 3380    | 0.237   | 0.247    |
| 15    | 10.878    | 120313   | 2670    | 0.263   | 0.195    |
| 16    | 11.663    | 451144   | 14611   | 0.985   | 1.067    |
| 17    | 13.048    | 131642   | 2330    | 0.288   | 0.170    |
| 18    | 14.440    | 42988    | 1324    | 0.094   | 0.097    |
| 19    | 15.166    | 66918    | 2442    | 0.146   | 0.178    |
| 20    | 15.944    | 496398   | 17845   | 1.084   | 1.303    |
| 21    | 17.045    | 13566203 | 456135  | 29.628  | 33.318   |
| 22    | 19.212    | 27774783 | 794734  | 60.659  | 58.050   |
| 23    | 21.695    | 1847269  | 17271   | 4.034   | 1.262    |
| 24    | 25.242    | 29058    | 802     | 0.063   | 0.059    |
| 25    | 28.474    | 22163    | 527     | 0.048   | 0.038    |
| 26    | 32.994    | 212701   | 3874    | 0.465   | 0.283    |
| Total |           | 45788168 | 1369042 | 100.000 | 100.000  |

# ==== Shimadzu LCsolution Analysis Report =====

E:\Pang\phenolic acid\2021-12-03 analyze sample\sample 2.1\_3-12-2021.lcd

Acquired by : Admin  
 Sample Name : sample 2.1\_3-12-2021\_Mightysil\_70Hex-30EtAc-0.2aa  
 Sample ID : sample 2.1\_3-12-21  
 Tray# : 1  
 Vail # : 1  
 Injection Volume : 10 uL  
 Data File Name : sample 2.1\_3-12-2021.lcd  
 Method File Name : phenolic acid 275.lcm  
 Batch File Name :  
 Report File Name : ethyl ferulate wavelength 275.lcr  
 Data Acquired : 3/12/2564 12:35:48  
 Data Processed : 21/12/2564 10:53:28

## <Chromatogram>

sample 2.1\_3-12-2021\_Mightysil\_70Hex-30EtAc-0.2aa

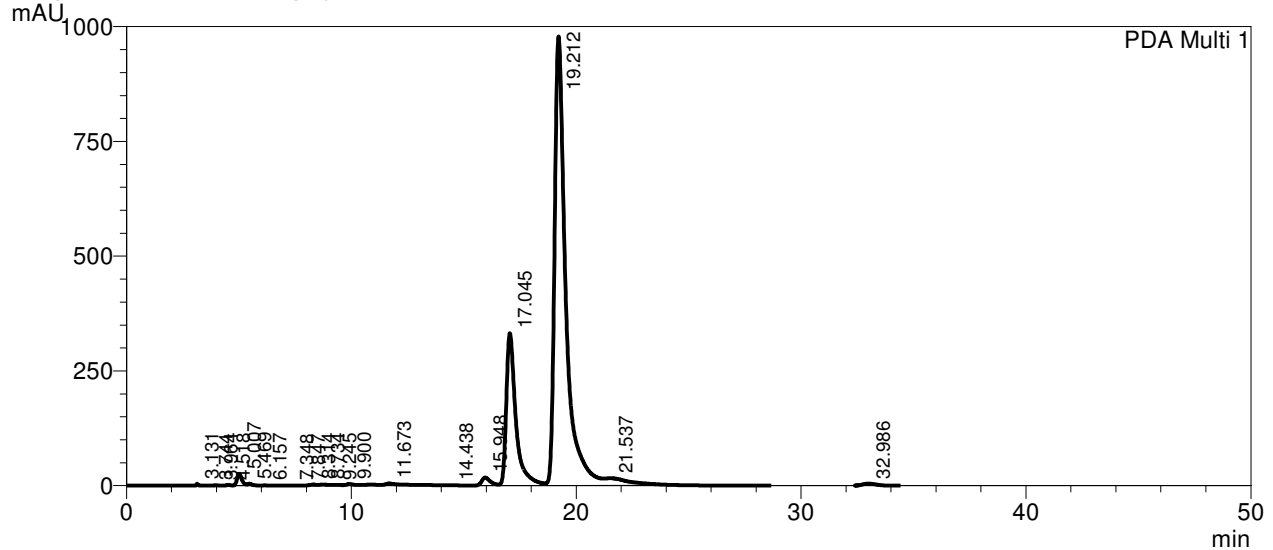

1 PDA Multi 1/320nm 4nm

PDA Ch1 320nm 4nm

| Peak# | Ret. Time | Area     | Height  | Area %  | Height % |
|-------|-----------|----------|---------|---------|----------|
| 1     | 3.131     | 24955    | 4941    | 0.054   | 0.357    |
| 2     | 3.744     | 2631     | 303     | 0.006   | 0.022    |
| 3     | 3.964     | 15812    | 1234    | 0.034   | 0.089    |
| 4     | 4.518     | 22023    | 1596    | 0.047   | 0.115    |
| 5     | 5.007     | 395858   | 26149   | 0.850   | 1.888    |
| 6     | 5.469     | 46542    | 4080    | 0.100   | 0.295    |
| 7     | 6.157     | 3353     | 292     | 0.007   | 0.021    |
| 8     | 7.348     | 1157     | 112     | 0.002   | 0.008    |
| 9     | 7.847     | 5946     | 379     | 0.013   | 0.027    |
| 10    | 8.314     | 39355    | 2314    | 0.084   | 0.167    |
| 11    | 8.734     | 48119    | 1832    | 0.103   | 0.132    |
| 12    | 9.245     | 15551    | 861     | 0.033   | 0.062    |
| 13    | 9.900     | 33820    | 2075    | 0.073   | 0.150    |
| 14    | 11.673    | 87007    | 3070    | 0.187   | 0.222    |
| 15    | 14.438    | 4716     | 222     | 0.010   | 0.016    |
| 16    | 15.948    | 464658   | 17517   | 0.997   | 1.265    |
| 17    | 17.045    | 9818616  | 331490  | 21.075  | 23.935   |
| 18    | 19.212    | 35087219 | 977907  | 75.313  | 70.610   |
| 19    | 21.537    | 131323   | 2821    | 0.282   | 0.204    |
| 20    | 32.986    | 339625   | 5737    | 0.729   | 0.414    |
| Total |           | 46588285 | 1384932 | 100.000 | 100.000  |

# ==== Shimadzu LCsolution Analysis Report =====

E:\Pang\phenolic acid\2021-12-03 analyze sample\sample 2.2\_3-12-2021.lcd  
 Acquired by : Admin  
 Sample Name : sample 2.2\_3-12-2021\_Mightysil\_70Hex-30EtAc-0.2aa  
 Sample ID : sample 2.2\_3-12-21  
 Tray# : 1  
 Vial # : 1  
 Injection Volume : 10 uL  
 Data File Name : sample 2.2\_3-12-2021.lcd  
 Method File Name : phenolic acid 275.lcm  
 Batch File Name :  
 Report File Name : ethyl ferulate wavelength 275.lcr  
 Data Acquired : 3/12/2564 14:15:22  
 Data Processed : 21/12/2564 10:55:04

## <Chromatogram>

sample 2.2\_3-12-2021\_Mightysil\_70Hex-30EtAc-0.2aa

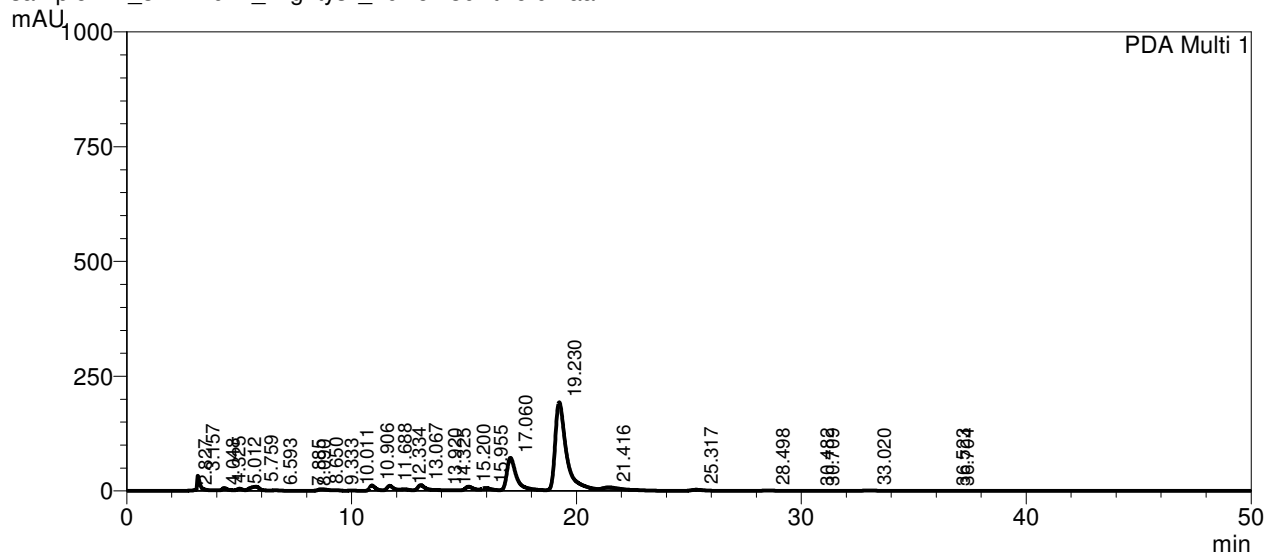

1 PDA Multi 1/257nm 4nm

PDA Ch1 257nm 4nm

| Peak# | Ret. Time | Area    | Height | Area % | Height % |
|-------|-----------|---------|--------|--------|----------|
| 1     | 2.827     | 5193    | 439    | 0.044  | 0.114    |
| 2     | 3.157     | 367583  | 32843  | 3.134  | 8.510    |
| 3     | 4.048     | 3029    | 338    | 0.026  | 0.088    |
| 4     | 4.325     | 109467  | 6433   | 0.933  | 1.667    |
| 5     | 5.012     | 97646   | 4753   | 0.833  | 1.232    |
| 6     | 5.759     | 291773  | 8939   | 2.488  | 2.316    |
| 7     | 6.593     | 38755   | 1734   | 0.330  | 0.449    |
| 8     | 7.885     | 3407    | 253    | 0.029  | 0.065    |
| 9     | 8.090     | 2208    | 346    | 0.019  | 0.090    |
| 10    | 8.650     | 115653  | 3711   | 0.986  | 0.962    |
| 11    | 9.333     | 26575   | 1363   | 0.227  | 0.353    |
| 12    | 10.011    | 15085   | 691    | 0.129  | 0.179    |
| 13    | 10.906    | 211030  | 11431  | 1.799  | 2.962    |
| 14    | 11.688    | 220457  | 10543  | 1.880  | 2.732    |
| 15    | 12.334    | 72581   | 2949   | 0.619  | 0.764    |
| 16    | 13.067    | 283375  | 11819  | 2.416  | 3.062    |
| 17    | 13.920    | 12779   | 734    | 0.109  | 0.190    |
| 18    | 14.325    | 1239    | 250    | 0.011  | 0.065    |
| 19    | 15.200    | 193607  | 8084   | 1.651  | 2.095    |
| 20    | 15.955    | 156331  | 5577   | 1.333  | 1.445    |
| 21    | 17.060    | 2117826 | 71274  | 18.056 | 18.468   |
| 22    | 19.230    | 7023765 | 192425 | 59.883 | 49.859   |
| 23    | 21.416    | 165756  | 4124   | 1.413  | 1.068    |
| 24    | 25.317    | 114633  | 2690   | 0.977  | 0.697    |
| 25    | 28.498    | 35579   | 769    | 0.303  | 0.199    |
| 26    | 30.482    | 7148    | 286    | 0.061  | 0.074    |
| 27    | 30.709    | 2007    | 214    | 0.017  | 0.055    |
| 28    | 33.020    | 31911   | 734    | 0.272  | 0.190    |
| 29    | 36.523    | 1259    | 95     | 0.011  | 0.025    |

| Peak# | Ret. Time | Area     | Height | Area %  | Height % |
|-------|-----------|----------|--------|---------|----------|
| 30    | 36.704    | 1403     | 96     | 0.012   | 0.025    |
| Total |           | 11729059 | 385937 | 100.000 | 100.000  |

# ==== Shimadzu LCsolution Analysis Report =====

E:\Pang\phenolic acid\2021-12-03 analyze sample\sample 2.2\_3-12-2021.lcd  
 Acquired by : Admin  
 Sample Name : sample 2.2\_3-12-2021\_Mightysil\_70Hex-30EtAc-0.2aa  
 Sample ID : sample 2.2\_3-12-21  
 Tray# : 1  
 Vial # : 1  
 Injection Volume : 10 uL  
 Data File Name : sample 2.2\_3-12-2021.lcd  
 Method File Name : phenolic acid 275.lcm  
 Batch File Name :  
 Report File Name : ethyl ferulate wavelength 275.lcr  
 Data Acquired : 3/12/2564 14:15:22  
 Data Processed : 21/12/2564 10:55:04

## <Chromatogram>

sample 2.2\_3-12-2021\_Mightysil\_70Hex-30EtAc-0.2aa

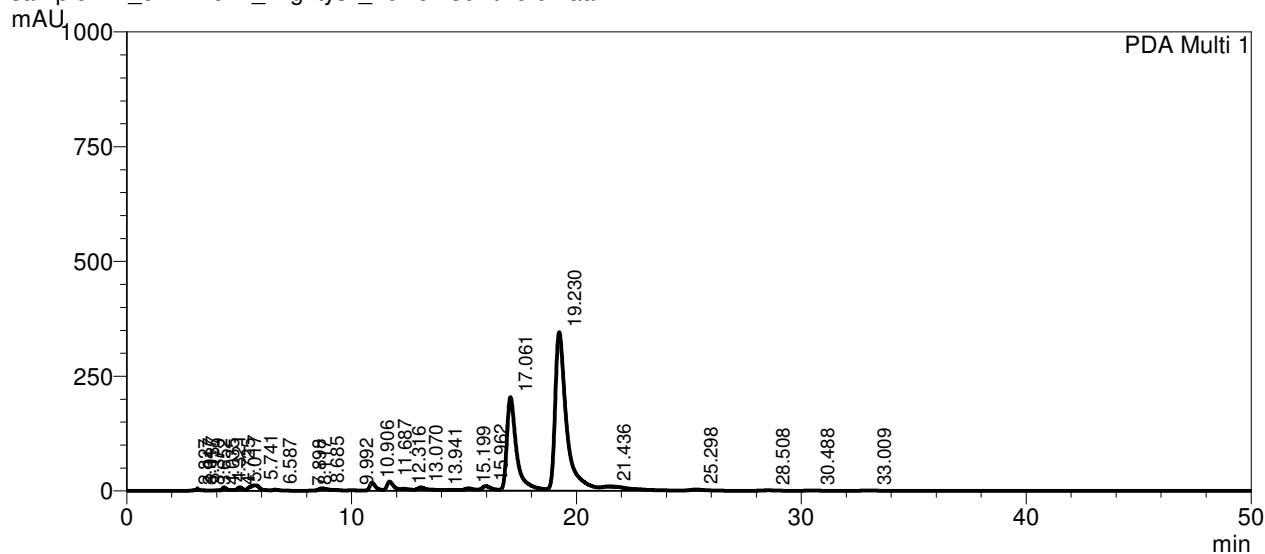

1 PDA Multi 1/271nm 4nm

PDA Ch1 271nm 4nm

| Peak# | Ret. Time | Area     | Height | Area % | Height % |
|-------|-----------|----------|--------|--------|----------|
| 1     | 2.827     | 3082     | 328    | 0.014  | 0.049    |
| 2     | 3.017     | 15129    | 1999   | 0.071  | 0.301    |
| 3     | 3.137     | 30588    | 5181   | 0.144  | 0.780    |
| 4     | 3.379     | 13231    | 1034   | 0.062  | 0.156    |
| 5     | 3.652     | 11032    | 759    | 0.052  | 0.114    |
| 6     | 4.035     | 19612    | 1423   | 0.092  | 0.214    |
| 7     | 4.321     | 114709   | 7785   | 0.540  | 1.172    |
| 8     | 4.725     | 13004    | 1710   | 0.061  | 0.257    |
| 9     | 5.017     | 132689   | 7850   | 0.624  | 1.182    |
| 10    | 5.741     | 397277   | 12024  | 1.869  | 1.811    |
| 11    | 6.587     | 61509    | 2591   | 0.289  | 0.390    |
| 12    | 7.898     | 1265     | 167    | 0.006  | 0.025    |
| 13    | 8.117     | 2446     | 331    | 0.012  | 0.050    |
| 14    | 8.685     | 195079   | 5237   | 0.918  | 0.789    |
| 15    | 9.992     | 23823    | 1132   | 0.112  | 0.170    |
| 16    | 10.906    | 311688   | 17170  | 1.466  | 2.586    |
| 17    | 11.687    | 403685   | 19401  | 1.899  | 2.922    |
| 18    | 12.316    | 82904    | 3366   | 0.390  | 0.507    |
| 19    | 13.070    | 153679   | 5975   | 0.723  | 0.900    |
| 20    | 13.941    | 5037     | 377    | 0.024  | 0.057    |
| 21    | 15.199    | 88826    | 3856   | 0.418  | 0.581    |
| 22    | 15.962    | 230125   | 8718   | 1.082  | 1.313    |
| 23    | 17.061    | 5990192  | 202813 | 28.176 | 30.545   |
| 24    | 19.230    | 12537482 | 344249 | 58.973 | 51.846   |
| 25    | 21.436    | 199846   | 3722   | 0.940  | 0.561    |
| 26    | 25.298    | 103495   | 2257   | 0.487  | 0.340    |
| 27    | 28.508    | 55945    | 1048   | 0.263  | 0.158    |
| 28    | 30.488    | 34147    | 798    | 0.161  | 0.120    |
| 29    | 33.009    | 28073    | 680    | 0.132  | 0.102    |

| Peak# | Ret. Time | Area     | Height | Area %  | Height % |
|-------|-----------|----------|--------|---------|----------|
| Total |           | 21259602 | 663980 | 100.000 | 100.000  |

# ==== Shimadzu LCsolution Analysis Report =====

E:\Pang\phenolic acid\2021-12-03 analyze sample\sample 2.2\_3-12-2021.lcd  
 Acquired by : Admin  
 Sample Name : sample 2.2\_3-12-2021\_Mightysil\_70Hex-30EtAc-0.2aa  
 Sample ID : sample 2.2\_3-12-21  
 Tray# : 1  
 Vial # : 1  
 Injection Volume : 10 uL  
 Data File Name : sample 2.2\_3-12-2021.lcd  
 Method File Name : phenolic acid 275.lcm  
 Batch File Name :  
 Report File Name : ethyl ferulate wavelength 275.lcr  
 Data Acquired : 3/12/2564 14:15:22  
 Data Processed : 21/12/2564 10:55:04

## <Chromatogram>

sample 2.2\_3-12-2021\_Mightysil\_70Hex-30EtAc-0.2aa

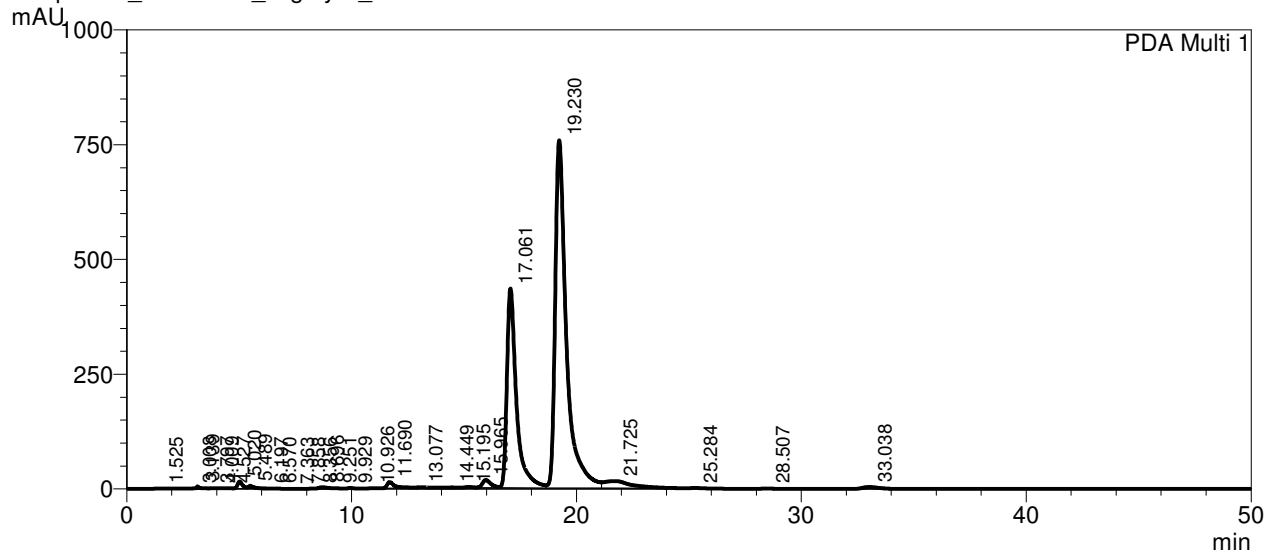

1 PDA Multi 1/300nm 4nm

PDA Ch1 300nm 4nm

| Peak# | Ret. Time | Area     | Height  | Area %  | Height % |
|-------|-----------|----------|---------|---------|----------|
| 1     | 1.525     | 2968     | 27      | 0.007   | 0.002    |
| 2     | 3.008     | 1303     | 173     | 0.003   | 0.014    |
| 3     | 3.139     | 31851    | 4713    | 0.076   | 0.368    |
| 4     | 3.797     | 3163     | 293     | 0.008   | 0.023    |
| 5     | 4.009     | 10970    | 685     | 0.026   | 0.053    |
| 6     | 4.527     | 14085    | 805     | 0.034   | 0.063    |
| 7     | 5.020     | 240994   | 15420   | 0.573   | 1.203    |
| 8     | 5.489     | 104947   | 6079    | 0.250   | 0.474    |
| 9     | 6.197     | 1489     | 171     | 0.004   | 0.013    |
| 10    | 6.570     | 5125     | 342     | 0.012   | 0.027    |
| 11    | 7.363     | 1656     | 137     | 0.004   | 0.011    |
| 12    | 7.858     | 1187     | 131     | 0.003   | 0.010    |
| 13    | 8.356     | 13451    | 897     | 0.032   | 0.070    |
| 14    | 8.696     | 94724    | 3195    | 0.225   | 0.249    |
| 15    | 9.251     | 26853    | 1440    | 0.064   | 0.112    |
| 16    | 9.929     | 26182    | 1620    | 0.062   | 0.126    |
| 17    | 10.926    | 14186    | 688     | 0.034   | 0.054    |
| 18    | 11.690    | 313843   | 13327   | 0.747   | 1.040    |
| 19    | 13.077    | 17939    | 801     | 0.043   | 0.062    |
| 20    | 14.449    | 7552     | 383     | 0.018   | 0.030    |
| 21    | 15.195    | 37752    | 1735    | 0.090   | 0.135    |
| 22    | 15.965    | 442326   | 16831   | 1.053   | 1.313    |
| 23    | 17.061    | 12788161 | 434179  | 30.431  | 33.873   |
| 24    | 19.230    | 26255221 | 757437  | 62.477  | 59.092   |
| 25    | 21.725    | 1287620  | 14788   | 3.064   | 1.154    |
| 26    | 25.284    | 22758    | 679     | 0.054   | 0.053    |
| 27    | 28.507    | 24067    | 491     | 0.057   | 0.038    |
| 28    | 33.038    | 231469   | 4332    | 0.551   | 0.338    |
| Total |           | 42023843 | 1281800 | 100.000 | 100.000  |

# ==== Shimadzu LCsolution Analysis Report =====

E:\Pang\phenolic acid\2021-12-03 analyze sample\sample 2.2\_3-12-2021.lcd

Acquired by : Admin  
 Sample Name : sample 2.2\_3-12-2021\_Mightysil\_70Hex-30EtAc-0.2aa  
 Sample ID : sample 2.2\_3-12-21  
 Tray# : 1  
 Vial # : 1  
 Injection Volume : 10 uL  
 Data File Name : sample 2.2\_3-12-2021.lcd  
 Method File Name : phenolic acid 275.lcm  
 Batch File Name :  
 Report File Name : ethyl ferulate wavelength 275.lcr  
 Data Acquired : 3/12/2564 14:15:22  
 Data Processed : 21/12/2564 10:55:04

## <Chromatogram>

sample 2.2\_3-12-2021\_Mightysil\_70Hex-30EtAc-0.2aa

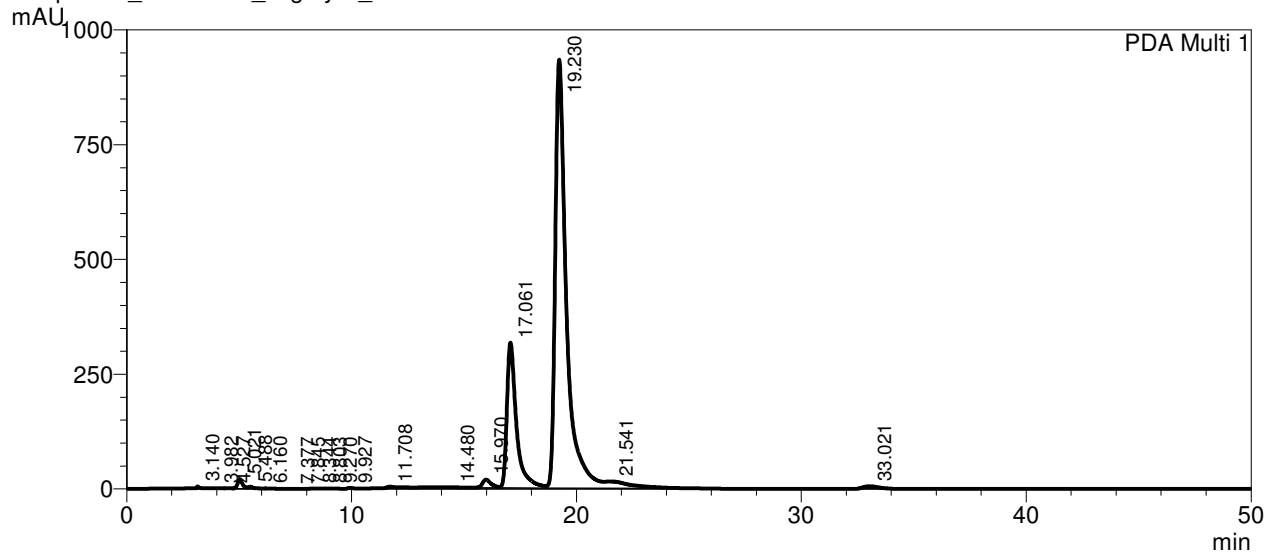

1 PDA Multi 1/320nm 4nm

PDA Ch1 320nm 4nm

| Peak# | Ret. Time | Area     | Height  | Area %  | Height % |
|-------|-----------|----------|---------|---------|----------|
| 1     | 3.140     | 27953    | 4573    | 0.063   | 0.349    |
| 2     | 3.982     | 3258     | 246     | 0.007   | 0.019    |
| 3     | 4.527     | 5629     | 512     | 0.013   | 0.039    |
| 4     | 5.021     | 289961   | 19062   | 0.658   | 1.454    |
| 5     | 5.488     | 46982    | 3962    | 0.107   | 0.302    |
| 6     | 6.160     | 2762     | 240     | 0.006   | 0.018    |
| 7     | 7.377     | 2568     | 200     | 0.006   | 0.015    |
| 8     | 7.845     | 2153     | 190     | 0.005   | 0.015    |
| 9     | 8.344     | 14885    | 929     | 0.034   | 0.071    |
| 10    | 8.803     | 30541    | 950     | 0.069   | 0.072    |
| 11    | 9.270     | 12046    | 715     | 0.027   | 0.055    |
| 12    | 9.927     | 31197    | 2014    | 0.071   | 0.154    |
| 13    | 11.708    | 41316    | 2476    | 0.094   | 0.189    |
| 14    | 14.480    | 6512     | 252     | 0.015   | 0.019    |
| 15    | 15.970    | 450722   | 17192   | 1.023   | 1.311    |
| 16    | 17.061    | 9313882  | 316102  | 21.132  | 24.105   |
| 17    | 19.230    | 33288629 | 932693  | 75.526  | 71.123   |
| 18    | 21.541    | 124176   | 2621    | 0.282   | 0.200    |
| 19    | 33.021    | 380607   | 6449    | 0.864   | 0.492    |
| Total |           | 44075778 | 1311377 | 100.000 | 100.000  |



# ==== Shimadzu LCsolution Analysis Report =====

E:\Pang\phenolic acid\2021-12-03 analyze sample\sample 3.1\_6-12-2021.lcd  
 Acquired by : Admin  
 Sample Name : sample 3.1\_6-12-2021\_Mightysil\_70Hex-30EtAc-0.2aa  
 Sample ID : sample 3.1\_6-12-21  
 Tray# : 1  
 Vial # : 1  
 Injection Volume : 10 uL  
 Data File Name : sample 3.1\_6-12-2021.lcd  
 Method File Name : phenolic acid 275.lcm  
 Batch File Name :  
 Report File Name : ethyl ferulate wavelength 275.lcr  
 Data Acquired : 6/12/2564 9:25:09  
 Data Processed : 21/12/2564 10:56:25

## <Chromatogram>

sample 3.1\_6-12-2021\_Mightysil\_70Hex-30EtAc-0.2aa

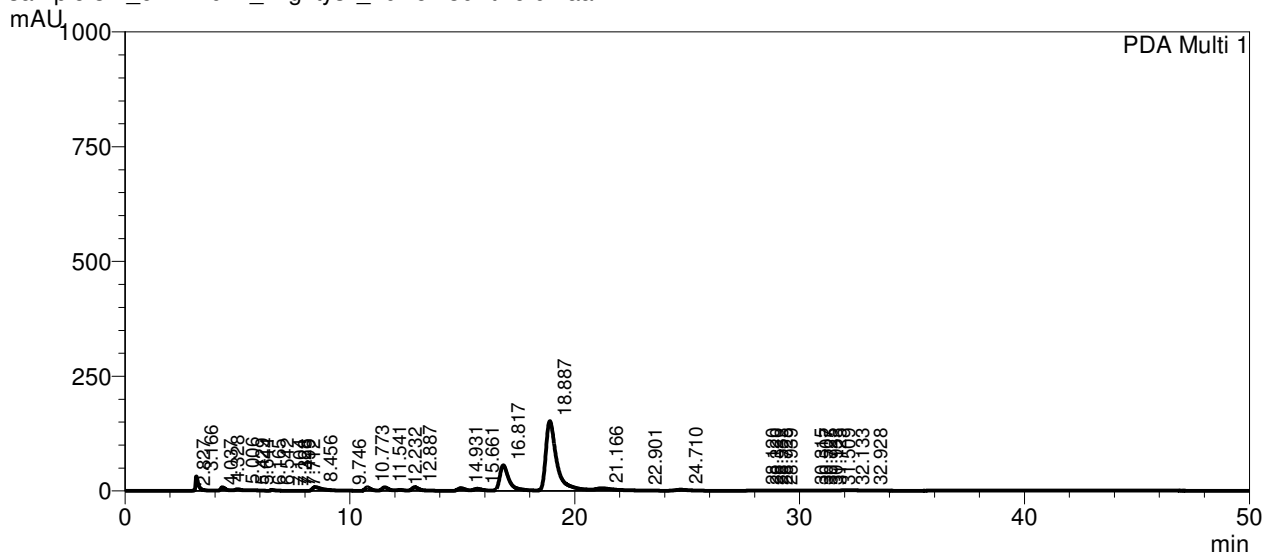

1 PDA Multi 1/257nm 4nm

PDA Ch1 257nm 4nm

| Peak# | Ret. Time | Area    | Height | Area % | Height % |
|-------|-----------|---------|--------|--------|----------|
| 1     | 2.827     | 2540    | 263    | 0.028  | 0.083    |
| 2     | 3.166     | 332373  | 31957  | 3.634  | 10.114   |
| 3     | 4.037     | 2119    | 258    | 0.023  | 0.082    |
| 4     | 4.328     | 141250  | 8254   | 1.545  | 2.612    |
| 5     | 5.006     | 80778   | 4041   | 0.883  | 1.279    |
| 6     | 5.429     | 14517   | 1740   | 0.159  | 0.551    |
| 7     | 5.644     | 50587   | 1792   | 0.553  | 0.567    |
| 8     | 6.165     | 12140   | 694    | 0.133  | 0.220    |
| 9     | 6.542     | 42795   | 2221   | 0.468  | 0.703    |
| 10    | 7.104     | 7759    | 531    | 0.085  | 0.168    |
| 11    | 7.328     | 2147    | 331    | 0.023  | 0.105    |
| 12    | 7.499     | 5460    | 349    | 0.060  | 0.110    |
| 13    | 7.712     | 4307    | 421    | 0.047  | 0.133    |
| 14    | 8.456     | 320586  | 8446   | 3.506  | 2.673    |
| 15    | 9.746     | 4719    | 160    | 0.052  | 0.051    |
| 16    | 10.773    | 149580  | 7781   | 1.636  | 2.463    |
| 17    | 11.541    | 165761  | 8157   | 1.813  | 2.582    |
| 18    | 12.232    | 56450   | 2229   | 0.617  | 0.706    |
| 19    | 12.887    | 204752  | 8169   | 2.239  | 2.586    |
| 20    | 14.931    | 139543  | 5983   | 1.526  | 1.894    |
| 21    | 15.661    | 129102  | 4578   | 1.412  | 1.449    |
| 22    | 16.817    | 1607513 | 55814  | 17.578 | 17.665   |
| 23    | 18.887    | 5339258 | 151849 | 58.383 | 48.060   |
| 24    | 21.166    | 143188  | 3416   | 1.566  | 1.081    |
| 25    | 22.901    | 1174    | 53     | 0.013  | 0.017    |

| Peak# | Ret. Time | Area    | Height | Area %  | Height % |
|-------|-----------|---------|--------|---------|----------|
| 26    | 24.710    | 88779   | 2251   | 0.971   | 0.712    |
| 27    | 28.120    | 17753   | 487    | 0.194   | 0.154    |
| 28    | 28.320    | 2466    | 377    | 0.027   | 0.119    |
| 29    | 28.533    | 3743    | 310    | 0.041   | 0.098    |
| 30    | 28.725    | 3661    | 275    | 0.040   | 0.087    |
| 31    | 28.939    | 1426    | 172    | 0.016   | 0.054    |
| 32    | 30.315    | 1969    | 161    | 0.022   | 0.051    |
| 33    | 30.507    | 2263    | 224    | 0.025   | 0.071    |
| 34    | 30.725    | 2088    | 277    | 0.023   | 0.088    |
| 35    | 30.933    | 2873    | 255    | 0.031   | 0.081    |
| 36    | 31.125    | 2632    | 209    | 0.029   | 0.066    |
| 37    | 31.509    | 3723    | 220    | 0.041   | 0.070    |
| 38    | 32.133    | 49889   | 1026   | 0.546   | 0.325    |
| 39    | 32.928    | 1531    | 223    | 0.017   | 0.071    |
| Total |           | 9145195 | 315957 | 100.000 | 100.000  |

# ==== Shimadzu LCsolution Analysis Report =====

E:\Pang\phenolic acid\2021-12-03 analyze sample\sample 3.1\_6-12-2021.lcd  
 Acquired by : Admin  
 Sample Name : sample 3.1\_6-12-2021\_Mightysil\_70Hex-30EtAc-0.2aa  
 Sample ID : sample 3.1\_6-12-21  
 Tray# : 1  
 Vial # : 1  
 Injection Volume : 10 uL  
 Data File Name : sample 3.1\_6-12-2021.lcd  
 Method File Name : phenolic acid 275.lcm  
 Batch File Name :  
 Report File Name : ethyl ferulate wavelength 275.lcr  
 Data Acquired : 6/12/2564 9:25:09  
 Data Processed : 21/12/2564 10:56:25

## <Chromatogram>

sample 3.1\_6-12-2021\_Mightysil\_70Hex-30EtAc-0.2aa

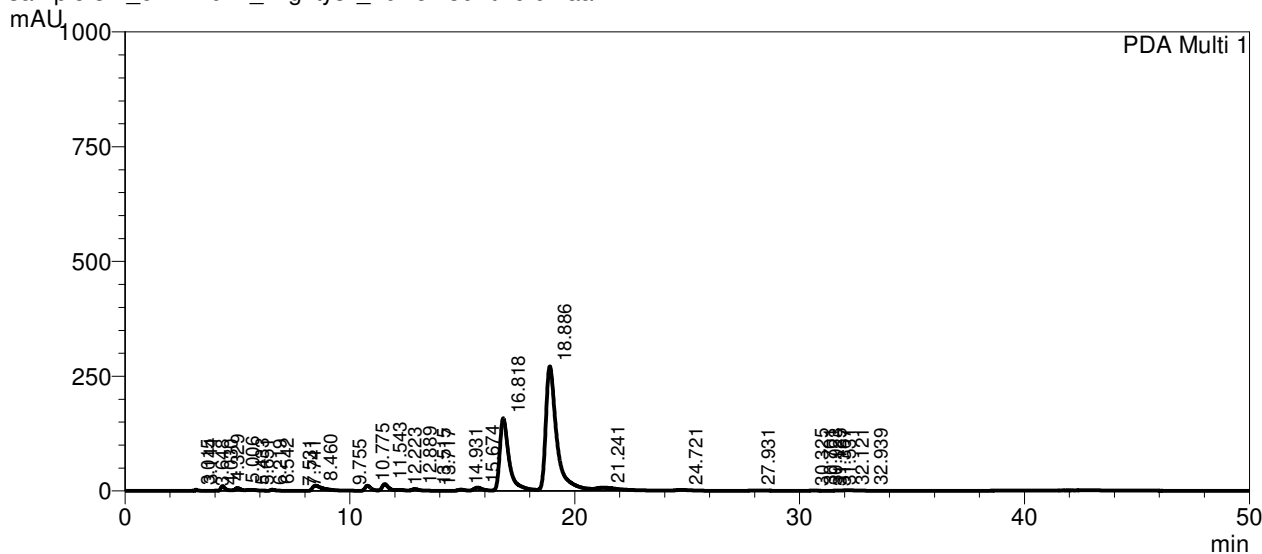

1 PDA Multi 1/271nm 4nm

PDA Ch1 271nm 4nm

| Peak# | Ret. Time | Area    | Height | Area % | Height % |
|-------|-----------|---------|--------|--------|----------|
| 1     | 3.015     | 7854    | 770    | 0.048  | 0.147    |
| 2     | 3.144     | 24055   | 2780   | 0.148  | 0.531    |
| 3     | 3.648     | 5074    | 409    | 0.031  | 0.078    |
| 4     | 4.030     | 11334   | 856    | 0.070  | 0.163    |
| 5     | 4.329     | 158884  | 10519  | 0.978  | 2.010    |
| 6     | 5.006     | 116255  | 6505   | 0.715  | 1.243    |
| 7     | 5.433     | 18620   | 2136   | 0.115  | 0.408    |
| 8     | 5.651     | 57952   | 2201   | 0.357  | 0.421    |
| 9     | 6.219     | 10755   | 605    | 0.066  | 0.116    |
| 10    | 6.542     | 51195   | 2742   | 0.315  | 0.524    |
| 11    | 7.531     | 1270    | 121    | 0.008  | 0.023    |
| 12    | 7.741     | 2908    | 236    | 0.018  | 0.045    |
| 13    | 8.460     | 402468  | 11562  | 2.477  | 2.209    |
| 14    | 9.755     | 29572   | 1014   | 0.182  | 0.194    |
| 15    | 10.775    | 211704  | 11535  | 1.303  | 2.204    |
| 16    | 11.543    | 300382  | 14837  | 1.849  | 2.835    |
| 17    | 12.223    | 52738   | 2179   | 0.325  | 0.416    |
| 18    | 12.889    | 90648   | 3962   | 0.558  | 0.757    |
| 19    | 13.515    | 2779    | 351    | 0.017  | 0.067    |
| 20    | 13.717    | 2760    | 227    | 0.017  | 0.043    |
| 21    | 14.931    | 60741   | 2815   | 0.374  | 0.538    |
| 22    | 15.674    | 195005  | 7161   | 1.200  | 1.368    |
| 23    | 16.818    | 4543483 | 158426 | 27.963 | 30.273   |
| 24    | 18.886    | 9554230 | 271205 | 58.801 | 51.824   |
| 25    | 21.241    | 168549  | 3158   | 1.037  | 0.603    |

| Peak# | Ret. Time | Area     | Height | Area %  | Height % |
|-------|-----------|----------|--------|---------|----------|
| 26    | 24.721    | 78338    | 1870   | 0.482   | 0.357    |
| 27    | 27.931    | 12029    | 386    | 0.074   | 0.074    |
| 28    | 30.325    | 1601     | 214    | 0.010   | 0.041    |
| 29    | 30.701    | 6767     | 316    | 0.042   | 0.060    |
| 30    | 30.923    | 3412     | 252    | 0.021   | 0.048    |
| 31    | 31.125    | 1531     | 175    | 0.009   | 0.033    |
| 32    | 31.307    | 2188     | 149    | 0.013   | 0.028    |
| 33    | 31.531    | 1499     | 261    | 0.009   | 0.050    |
| 34    | 32.121    | 57748    | 1155   | 0.355   | 0.221    |
| 35    | 32.939    | 2048     | 232    | 0.013   | 0.044    |
| Total |           | 16248375 | 523322 | 100.000 | 100.000  |

# ==== Shimadzu LCsolution Analysis Report =====

E:\Pang\phenolic acid\2021-12-03 analyze sample\sample 3.1\_6-12-2021.lcd  
 Acquired by : Admin  
 Sample Name : sample 3.1\_6-12-2021\_Mightysil\_70Hex-30EtAc-0.2aa  
 Sample ID : sample 3.1\_6-12-21  
 Tray# : 1  
 Vial # : 1  
 Injection Volume : 10 uL  
 Data File Name : sample 3.1\_6-12-2021.lcd  
 Method File Name : phenolic acid 275.lcm  
 Batch File Name :  
 Report File Name : ethyl ferulate wavelength 275.lcr  
 Data Acquired : 6/12/2564 9:25:09  
 Data Processed : 21/12/2564 10:56:25

## <Chromatogram>

sample 3.1\_6-12-2021\_Mightysil\_70Hex-30EtAc-0.2aa

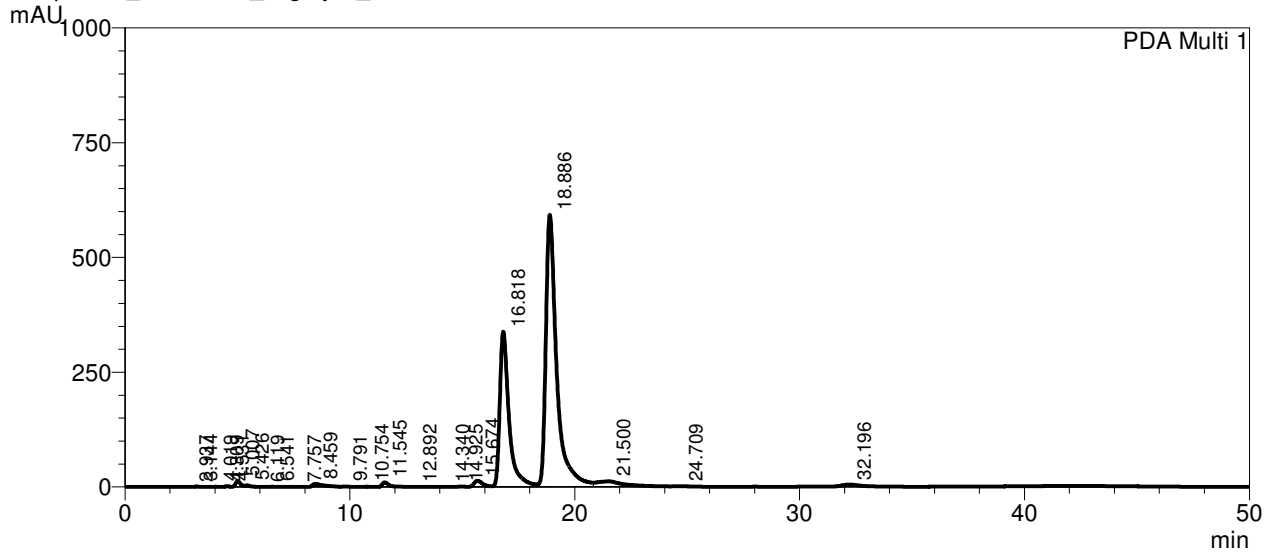

1 PDA Multi 1/300nm 4nm

PDA Ch1 300nm 4nm

| Peak# | Ret. Time | Area     | Height  | Area %  | Height % |
|-------|-----------|----------|---------|---------|----------|
| 1     | 2.937     | 1648     | 274     | 0.005   | 0.027    |
| 2     | 3.144     | 13600    | 1928    | 0.042   | 0.192    |
| 3     | 4.019     | 6267     | 530     | 0.019   | 0.053    |
| 4     | 4.309     | 1298     | 202     | 0.004   | 0.020    |
| 5     | 4.531     | 20885    | 1683    | 0.065   | 0.167    |
| 6     | 5.007     | 202047   | 12781   | 0.627   | 1.272    |
| 7     | 5.426     | 57380    | 3914    | 0.178   | 0.389    |
| 8     | 6.119     | 8172     | 460     | 0.025   | 0.046    |
| 9     | 6.541     | 9573     | 624     | 0.030   | 0.062    |
| 10    | 7.757     | 1332     | 131     | 0.004   | 0.013    |
| 11    | 8.459     | 261460   | 6909    | 0.812   | 0.687    |
| 12    | 9.791     | 32473    | 1346    | 0.101   | 0.134    |
| 13    | 10.754    | 21365    | 759     | 0.066   | 0.075    |
| 14    | 11.545    | 234027   | 10242   | 0.726   | 1.019    |
| 15    | 12.892    | 7260     | 414     | 0.023   | 0.041    |
| 16    | 14.340    | 4545     | 278     | 0.014   | 0.028    |
| 17    | 14.925    | 24621    | 1216    | 0.076   | 0.121    |
| 18    | 15.674    | 369475   | 13735   | 1.147   | 1.367    |
| 19    | 16.818    | 9688620  | 338324  | 30.076  | 33.662   |
| 20    | 18.886    | 20023439 | 592584  | 62.157  | 58.961   |
| 21    | 21.500    | 950538   | 11569   | 2.951   | 1.151    |
| 22    | 24.709    | 23032    | 670     | 0.071   | 0.067    |
| 23    | 32.196    | 251161   | 4480    | 0.780   | 0.446    |
| Total |           | 32214221 | 1005051 | 100.000 | 100.000  |

# ==== Shimadzu LCsolution Analysis Report =====

E:\Pang\phenolic acid\2021-12-03 analyze sample\sample 3.1\_6-12-2021.lcd  
 Acquired by : Admin  
 Sample Name : sample 3.1\_6-12-2021\_Mightysil\_70Hex-30EtAc-0.2aa  
 Sample ID : sample 3.1\_6-12-21  
 Tray# : 1  
 Vial # : 1  
 Injection Volume : 10 uL  
 Data File Name : sample 3.1\_6-12-2021.lcd  
 Method File Name : phenolic acid 275.lcm  
 Batch File Name :  
 Report File Name : ethyl ferulate wavelength 275.lcr  
 Data Acquired : 6/12/2564 9:25:09  
 Data Processed : 21/12/2564 10:56:25

## <Chromatogram>

sample 3.1\_6-12-2021\_Mightysil\_70Hex-30EtAc-0.2aa

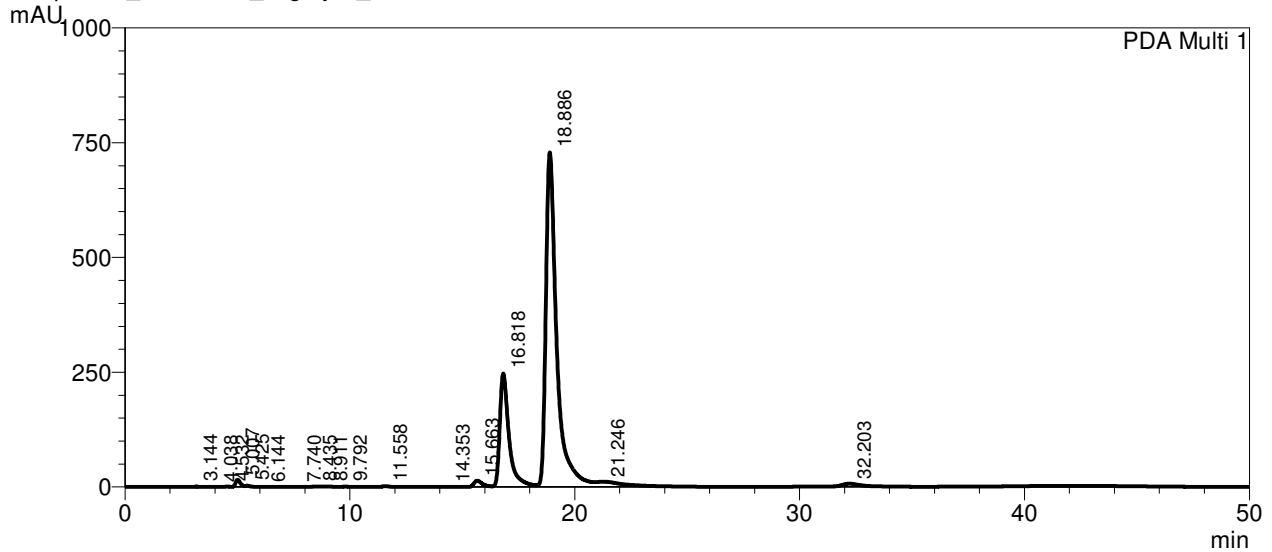

1 PDA Multi 1/320nm 4nm

PDA Ch1 320nm 4nm

| Peak# | Ret. Time | Area     | Height  | Area %  | Height % |
|-------|-----------|----------|---------|---------|----------|
| 1     | 3.144     | 10698    | 1717    | 0.032   | 0.167    |
| 2     | 4.038     | 2801     | 175     | 0.008   | 0.017    |
| 3     | 4.532     | 15484    | 1314    | 0.046   | 0.128    |
| 4     | 5.007     | 247000   | 15938   | 0.732   | 1.552    |
| 5     | 5.425     | 42165    | 3105    | 0.125   | 0.302    |
| 6     | 6.144     | 8185     | 415     | 0.024   | 0.040    |
| 7     | 7.740     | 2141     | 185     | 0.006   | 0.018    |
| 8     | 8.435     | 27166    | 1308    | 0.080   | 0.127    |
| 9     | 8.911     | 46081    | 1282    | 0.137   | 0.125    |
| 10    | 9.792     | 21640    | 1229    | 0.064   | 0.120    |
| 11    | 11.558    | 39100    | 2063    | 0.116   | 0.201    |
| 12    | 14.353    | 3291     | 192     | 0.010   | 0.019    |
| 13    | 15.663    | 381108   | 13999   | 1.129   | 1.363    |
| 14    | 16.818    | 7096048  | 247189  | 21.020  | 24.064   |
| 15    | 18.886    | 25319478 | 728612  | 75.002  | 70.930   |
| 16    | 21.246    | 117658   | 2156    | 0.349   | 0.210    |
| 17    | 32.203    | 378154   | 6343    | 1.120   | 0.617    |
| Total |           | 33758196 | 1027222 | 100.000 | 100.000  |

# ==== Shimadzu LCsolution Analysis Report =====

E:\Pang\phenolic acid\2021-12-03 analyze sample\sample 3.2\_6-12-2021.lcd

Acquired by : Admin  
 Sample Name : sample 3.2\_6-12-2021\_Mightysil\_70Hex-30EtAc-0.2aa  
 Sample ID : sample 3.2\_6-12-21  
 Tray# : 1  
 Vial # : 1  
 Injection Volume : 10 uL  
 Data File Name : sample 3.2\_6-12-2021.lcd  
 Method File Name : phenolic acid 275.lcm  
 Batch File Name :  
 Report File Name : ethyl ferulate wavelength 275.lcr  
 Data Acquired : 6/12/2564 11:03:20  
 Data Processed : 9/12/2564 12:02:17

## <Chromatogram>

sample 3.2\_6-12-2021\_Mightysil\_70Hex-30EtAc-0.2aa

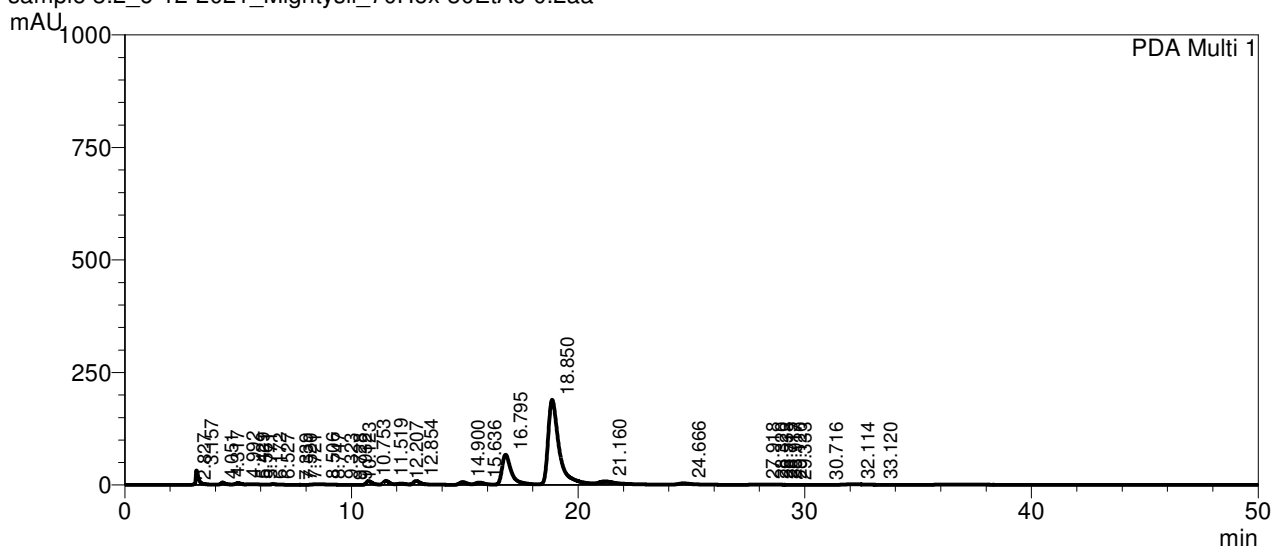

1 PDA Multi 1/257nm 4nm

PDA Ch1 257nm 4nm

| Peak# | Ret. Time | Area   | Height | Area % | Height % |
|-------|-----------|--------|--------|--------|----------|
| 1     | 2.827     | 4693   | 393    | 0.044  | 0.107    |
| 2     | 3.157     | 352529 | 32511  | 3.306  | 8.878    |
| 3     | 4.051     | 1780   | 213    | 0.017  | 0.058    |
| 4     | 4.317     | 88995  | 5548   | 0.835  | 1.515    |
| 5     | 4.992     | 86301  | 4154   | 0.809  | 1.134    |
| 6     | 5.429     | 17257  | 1759   | 0.162  | 0.480    |
| 7     | 5.561     | 22523  | 1916   | 0.211  | 0.523    |
| 8     | 5.771     | 29208  | 1774   | 0.274  | 0.485    |
| 9     | 6.172     | 16663  | 1002   | 0.156  | 0.274    |
| 10    | 6.527     | 48019  | 2149   | 0.450  | 0.587    |
| 11    | 7.339     | 1989   | 256    | 0.019  | 0.070    |
| 12    | 7.520     | 3701   | 358    | 0.035  | 0.098    |
| 13    | 7.721     | 6256   | 458    | 0.059  | 0.125    |
| 14    | 8.506     | 40751  | 1488   | 0.382  | 0.406    |
| 15    | 8.747     | 24664  | 1246   | 0.231  | 0.340    |
| 16    | 9.323     | 8698   | 501    | 0.082  | 0.137    |
| 17    | 9.728     | 4321   | 288    | 0.041  | 0.079    |
| 18    | 9.932     | 3442   | 327    | 0.032  | 0.089    |
| 19    | 10.123    | 1554   | 222    | 0.015  | 0.061    |
| 20    | 10.753    | 159554 | 8640   | 1.496  | 2.359    |

| Peak# | Ret. Time | Area     | Height | Area %  | Height % |
|-------|-----------|----------|--------|---------|----------|
| 21    | 11.519    | 172644   | 8903   | 1.619   | 2.431    |
| 22    | 12.207    | 79291    | 2878   | 0.744   | 0.786    |
| 23    | 12.854    | 214473   | 8704   | 2.011   | 2.377    |
| 24    | 14.900    | 137743   | 6091   | 1.292   | 1.663    |
| 25    | 15.636    | 144350   | 5091   | 1.354   | 1.390    |
| 26    | 16.795    | 1919174  | 66817  | 17.997  | 18.247   |
| 27    | 18.850    | 6624966  | 188679 | 62.124  | 51.527   |
| 28    | 21.160    | 195004   | 4939   | 1.829   | 1.349    |
| 29    | 24.666    | 112215   | 2775   | 1.052   | 0.758    |
| 30    | 27.918    | 29072    | 809    | 0.273   | 0.221    |
| 31    | 28.320    | 6201     | 581    | 0.058   | 0.159    |
| 32    | 28.533    | 2955     | 481    | 0.028   | 0.131    |
| 33    | 28.715    | 6800     | 424    | 0.064   | 0.116    |
| 34    | 28.917    | 2746     | 306    | 0.026   | 0.084    |
| 35    | 29.120    | 1145     | 196    | 0.011   | 0.054    |
| 36    | 29.333    | 1253     | 124    | 0.012   | 0.034    |
| 37    | 30.716    | 1072     | 79     | 0.010   | 0.022    |
| 38    | 32.114    | 70182    | 1431   | 0.658   | 0.391    |
| 39    | 33.120    | 1893     | 177    | 0.018   | 0.048    |
| 40    | 54.507    | 1085     | 76     | 0.010   | 0.021    |
| 41    | 54.720    | 1757     | 154    | 0.016   | 0.042    |
| 42    | 54.923    | 2034     | 210    | 0.019   | 0.057    |
| 43    | 55.104    | 3052     | 244    | 0.029   | 0.067    |
| 44    | 55.517    | 4304     | 259    | 0.040   | 0.071    |
| 45    | 55.723    | 2395     | 238    | 0.022   | 0.065    |
| 46    | 55.936    | 1986     | 172    | 0.019   | 0.047    |
| 47    | 56.128    | 1373     | 134    | 0.013   | 0.037    |
| Total |           | 10664066 | 366175 | 100.000 | 100.000  |



# ==== Shimadzu LCsolution Analysis Report =====

E:\Pang\phenolic acid\2021-12-03 analyze sample\sample 3.2\_6-12-2021.lcd

Acquired by : Admin  
 Sample Name : sample 3.2\_6-12-2021\_Mightysil\_70Hex-30EtAc-0.2aa  
 Sample ID : sample 3.2\_6-12-21  
 Tray# : 1  
 Vial # : 1  
 Injection Volume : 10 uL  
 Data File Name : sample 3.2\_6-12-2021.lcd  
 Method File Name : phenolic acid 275.lcm  
 Batch File Name :  
 Report File Name : ethyl ferulate wavelength 275.lcr  
 Data Acquired : 6/12/2564 11:03:20  
 Data Processed : 9/12/2564 12:02:17

## <Chromatogram>

sample 3.2\_6-12-2021\_Mightysil\_70Hex-30EtAc-0.2aa

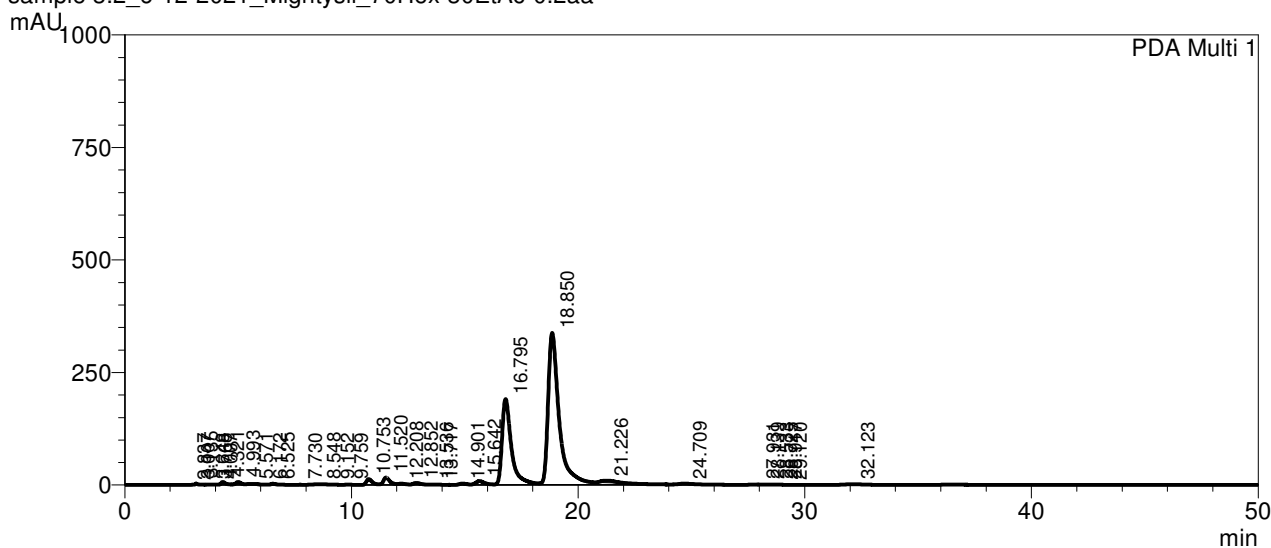

1 PDA Multi 1/271nm 4nm

PDA Ch1 271nm 4nm

| Peak# | Ret. Time | Area   | Height | Area % | Height % |
|-------|-----------|--------|--------|--------|----------|
| 1     | 2.837     | 4013   | 372    | 0.021  | 0.060    |
| 2     | 3.007     | 9358   | 1163   | 0.049  | 0.189    |
| 3     | 3.135     | 32693  | 3705   | 0.170  | 0.601    |
| 4     | 3.648     | 5333   | 718    | 0.028  | 0.117    |
| 5     | 3.768     | 8257   | 794    | 0.043  | 0.129    |
| 6     | 4.007     | 12067  | 902    | 0.063  | 0.146    |
| 7     | 4.321     | 101485 | 6825   | 0.527  | 1.108    |
| 8     | 4.993     | 116612 | 6496   | 0.605  | 1.054    |
| 9     | 5.571     | 77811  | 2264   | 0.404  | 0.367    |
| 10    | 6.172     | 13829  | 942    | 0.072  | 0.153    |
| 11    | 6.525     | 45967  | 2599   | 0.239  | 0.422    |
| 12    | 7.730     | 2655   | 247    | 0.014  | 0.040    |
| 13    | 8.548     | 63996  | 1626   | 0.332  | 0.264    |
| 14    | 9.152     | 11356  | 580    | 0.059  | 0.094    |
| 15    | 9.759     | 9681   | 378    | 0.050  | 0.061    |
| 16    | 10.753    | 233609 | 12980  | 1.213  | 2.107    |
| 17    | 11.520    | 327313 | 16392  | 1.699  | 2.661    |
| 18    | 12.208    | 65230  | 2574   | 0.339  | 0.418    |
| 19    | 12.852    | 100660 | 4307   | 0.523  | 0.699    |
| 20    | 13.536    | 3700   | 364    | 0.019  | 0.059    |

| Peak# | Ret. Time | Area     | Height | Area %  | Height % |
|-------|-----------|----------|--------|---------|----------|
| 21    | 13.717    | 2076     | 253    | 0.011   | 0.041    |
| 22    | 14.901    | 61270    | 2863   | 0.318   | 0.465    |
| 23    | 15.642    | 220346   | 8171   | 1.144   | 1.326    |
| 24    | 16.795    | 5450782  | 190288 | 28.302  | 30.888   |
| 25    | 18.850    | 11849251 | 336964 | 61.524  | 54.697   |
| 26    | 21.226    | 222948   | 4667   | 1.158   | 0.758    |
| 27    | 24.709    | 80348    | 2016   | 0.417   | 0.327    |
| 28    | 27.931    | 18995    | 887    | 0.099   | 0.144    |
| 29    | 28.139    | 16798    | 770    | 0.087   | 0.125    |
| 30    | 28.533    | 8597     | 506    | 0.045   | 0.082    |
| 31    | 28.725    | 4331     | 442    | 0.022   | 0.072    |
| 32    | 28.917    | 2775     | 308    | 0.014   | 0.050    |
| 33    | 29.120    | 1063     | 163    | 0.006   | 0.026    |
| 34    | 32.123    | 74418    | 1525   | 0.386   | 0.247    |
| Total |           | 19259623 | 616054 | 100.000 | 100.000  |

# ==== Shimadzu LCsolution Analysis Report =====

E:\Pang\phenolic acid\2021-12-03 analyze sample\sample 3.2\_6-12-2021.lcd

Acquired by : Admin  
 Sample Name : sample 3.2\_6-12-2021\_Mightysil\_70Hex-30EtAc-0.2aa  
 Sample ID : sample 3.2\_6-12-21  
 Tray# : 1  
 Vial # : 1  
 Injection Volume : 10 uL  
 Data File Name : sample 3.2\_6-12-2021.lcd  
 Method File Name : phenolic acid 275.lcm  
 Batch File Name :  
 Report File Name : ethyl ferulate wavelength 275.lcr  
 Data Acquired : 6/12/2564 11:03:20  
 Data Processed : 9/12/2564 12:02:17

## <Chromatogram>

sample 3.2\_6-12-2021\_Mightysil\_70Hex-30EtAc-0.2aa

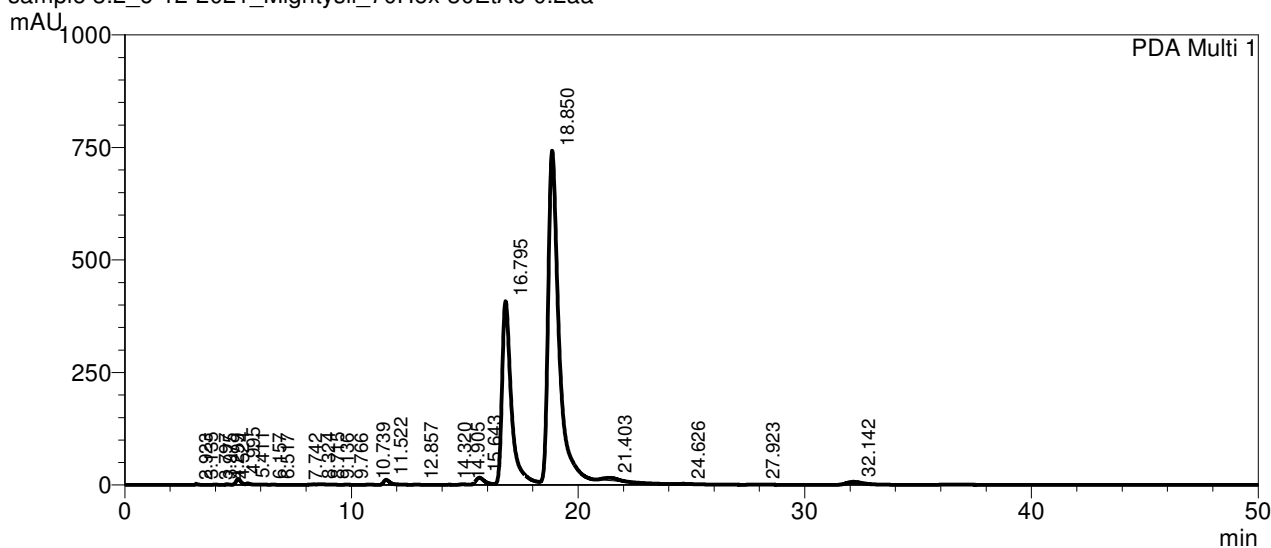

1 PDA Multi 1/300nm 4nm

PDA Ch1 300nm 4nm

| Peak# | Ret. Time | Area   | Height | Area % | Height % |
|-------|-----------|--------|--------|--------|----------|
| 1     | 2.923     | 1044   | 150    | 0.003  | 0.012    |
| 2     | 3.135     | 20802  | 2799   | 0.052  | 0.229    |
| 3     | 3.797     | 4853   | 420    | 0.012  | 0.034    |
| 4     | 3.975     | 11032  | 778    | 0.028  | 0.064    |
| 5     | 4.299     | 3171   | 336    | 0.008  | 0.028    |
| 6     | 4.524     | 16406  | 1217   | 0.041  | 0.100    |
| 7     | 4.995     | 202518 | 13191  | 0.509  | 1.081    |
| 8     | 5.411     | 52973  | 3499   | 0.133  | 0.287    |
| 9     | 6.157     | 14295  | 653    | 0.036  | 0.054    |
| 10    | 6.517     | 10938  | 666    | 0.027  | 0.055    |
| 11    | 7.742     | 3266   | 270    | 0.008  | 0.022    |
| 12    | 8.324     | 5084   | 341    | 0.013  | 0.028    |
| 13    | 8.715     | 3347   | 251    | 0.008  | 0.021    |
| 14    | 9.136     | 2560   | 155    | 0.006  | 0.013    |
| 15    | 9.766     | 12106  | 727    | 0.030  | 0.060    |
| 16    | 10.739    | 15900  | 671    | 0.040  | 0.055    |
| 17    | 11.522    | 242495 | 11226  | 0.609  | 0.920    |
| 18    | 12.857    | 8832   | 467    | 0.022  | 0.038    |
| 19    | 14.320    | 6428   | 383    | 0.016  | 0.031    |
| 20    | 14.905    | 25581  | 1283   | 0.064  | 0.105    |

| Peak# | Ret. Time | Area     | Height  | Area %  | Height % |
|-------|-----------|----------|---------|---------|----------|
| 21    | 15.643    | 440379   | 15970   | 1.106   | 1.309    |
| 22    | 16.795    | 11705919 | 407928  | 29.412  | 33.433   |
| 23    | 18.850    | 26271075 | 742362  | 66.007  | 60.843   |
| 24    | 21.403    | 288880   | 6299    | 0.726   | 0.516    |
| 25    | 24.626    | 31775    | 847     | 0.080   | 0.069    |
| 26    | 27.923    | 15123    | 432     | 0.038   | 0.035    |
| 27    | 32.142    | 383431   | 6816    | 0.963   | 0.559    |
| Total |           | 39800211 | 1220137 | 100.000 | 100.000  |

# ==== Shimadzu LCsolution Analysis Report =====

E:\Pang\phenolic acid\2021-12-03 analyze sample\sample 3.2\_6-12-2021.lcd

Acquired by : Admin  
 Sample Name : sample 3.2\_6-12-2021\_Mightysil\_70Hex-30EtAc-0.2aa  
 Sample ID : sample 3.2\_6-12-21  
 Tray# : 1  
 Vial # : 1  
 Injection Volume : 10 uL  
 Data File Name : sample 3.2\_6-12-2021.lcd  
 Method File Name : phenolic acid 275.lcm  
 Batch File Name :  
 Report File Name : ethyl ferulate wavelength 275.lcr  
 Data Acquired : 6/12/2564 11:03:20  
 Data Processed : 21/12/2564 11:59:56

## <Chromatogram>

sample 3.2\_6-12-2021\_Mightysil\_70Hex-30EtAc-0.2aa

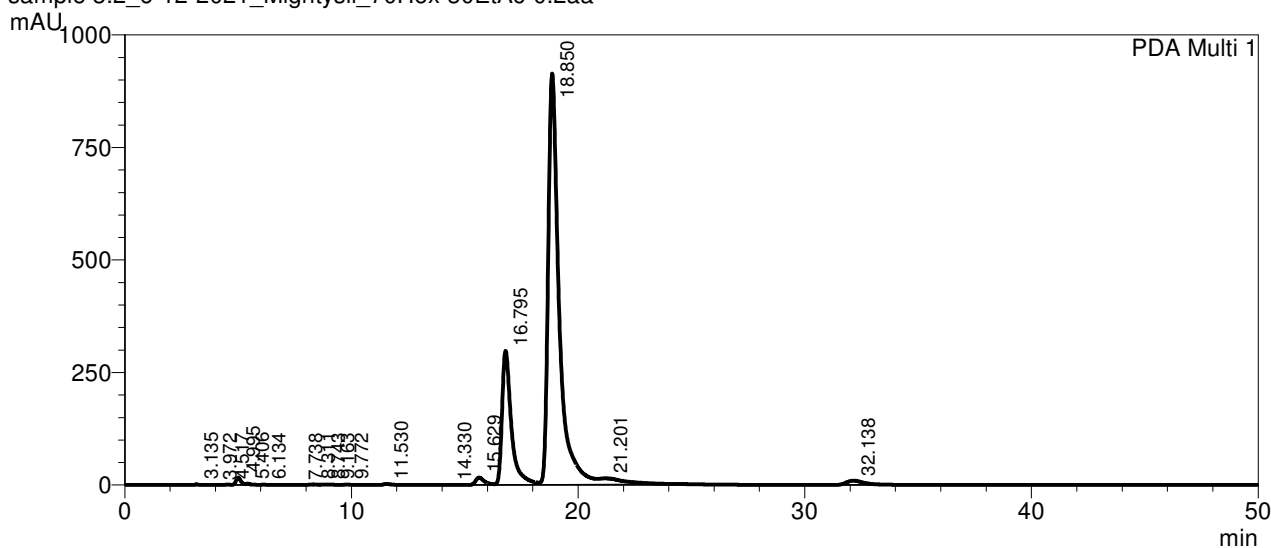

1 PDA Multi 1/320nm 4nm

PDA Ch1 320nm 4nm

| Peak# | Ret. Time | Area     | Height  | Area %  | Height % |
|-------|-----------|----------|---------|---------|----------|
| 1     | 3.135     | 12827    | 2370    | 0.031   | 0.187    |
| 2     | 3.972     | 7144     | 377     | 0.017   | 0.030    |
| 3     | 4.517     | 14188    | 985     | 0.034   | 0.078    |
| 4     | 4.995     | 248355   | 16367   | 0.596   | 1.289    |
| 5     | 5.406     | 40104    | 2864    | 0.096   | 0.226    |
| 6     | 6.134     | 8613     | 422     | 0.021   | 0.033    |
| 7     | 7.738     | 5472     | 375     | 0.013   | 0.030    |
| 8     | 8.311     | 22747    | 1142    | 0.055   | 0.090    |
| 9     | 8.743     | 20320    | 784     | 0.049   | 0.062    |
| 10    | 9.163     | 8231     | 528     | 0.020   | 0.042    |
| 11    | 9.772     | 15938    | 977     | 0.038   | 0.077    |
| 12    | 11.530    | 59275    | 2425    | 0.142   | 0.191    |
| 13    | 14.330    | 3859     | 229     | 0.009   | 0.018    |
| 14    | 15.629    | 446908   | 16249   | 1.072   | 1.280    |
| 15    | 16.795    | 8531579  | 297505  | 20.458  | 23.431   |
| 16    | 18.850    | 31567621 | 913506  | 75.696  | 71.945   |
| 17    | 21.201    | 146140   | 3004    | 0.350   | 0.237    |
| 18    | 32.138    | 543634   | 9615    | 1.304   | 0.757    |
| Total |           | 41702956 | 1269724 | 100.000 | 100.000  |
